# Supplementary material for: Analysis and calibration of optimal power balance rotor-effective wind speed estimation schemes for large-scale wind turbines
Source: Copernicus journal article supplement (doi:10.5194/wes-2024-158), 2024-11-15
Supplement: Supplementary file [file wes-2024-158-AC1-supplement.pdf]

Date January 27, 2025  
Our reference n/a  
Your reference wes-2024-158  
Contact person Atindriyo K. Pamososuryo  
Telephone +31 (0)15 27 85248  
E-mail A.K.Pamososuryo@TUDelft.nl  
Subject Author's Response

**Delft University of Technology**

---

Delft Center for Systems and Control

Address  
Mekelweg 2 (ME building)  
2628 CD Delft  
The Netherlands

Reviewers  
*Wind Energy Science Journal*

Dear reviewers,

The authors would like to thank the reviewers for the constructive and thorough comments and suggestions for our paper. We believe that your feedback has helped us significantly improve the quality of the manuscript.

To consider all the feedback, the paper has been carefully revised. The objective of this document is to reply to the points raised and provide a detailed overview of the changes made. For each comment, a point-to-point response is provided in **blue color**, while the corresponding changes to the manuscript are reported in **red**. Please note that, in the enclosed marked-up version of the revised manuscript, the removed and added portions of the manuscript are indicated by red strikethrough text and blue underlined text, respectively. We hope that this document provides satisfying answers to the reviewers' comments.

Yours sincerely,

Atindriyo K. Pamososuryo  
Fabio Spagnolo  
Sebastiaan P. Mulders

Enclosure(s): General notice  
Response to Reviewer 1  
Response to Reviewer 2  
Response to Reviewer 3  
Marked-up version of the revised manuscript

## General notice

Apart from the changes made in our responses to the reviewers' comments and questions, we include an additional figure for better clarity in the revised manuscript. This new figure (Fig. 5) depicts the internal structure of the state estimation-based aerodynamic power estimator, which is described by the state space system in (18). As a consequence, Figs. 5-16 in the original manuscript become Figs. 6-17 in the revised manuscript. Nevertheless, to prevent confusion in our responses below, we retain the indexing convention of the original manuscript. We thank the reviewers for their understanding.

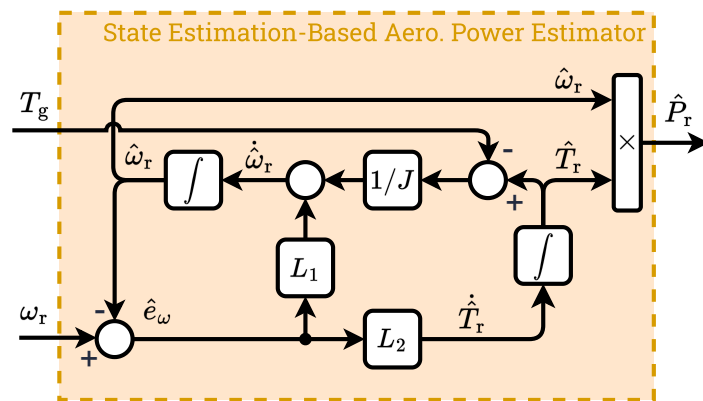

**Figure 5.** Internal structure of the state estimation-based aerodynamic power estimator. Note that the aerodynamic power estimate  $\hat{P}_r$  is the product of the rotor speed estimate  $\hat{\omega}_r$  and aerodynamic torque estimate  $\hat{T}_r$ . See Remark 4 for more details.

### Revised portion prior to (18):

The general state space expression for the state estimator—as depicted in Fig.5, augmenting (17) to (16) and also including feedback from the measured system output  $y = \omega_r$ , is written as follows. . .

# Response to Reviewer 1

## General Comments

The paper is well written and makes valuable contributions which opens the path to better and more accurate rotor effective wind estimators. This is critical to achieve effective control and lowering of loads and thus cost on modern very large wind turbines.

The work is based on a number of assumptions which significantly limits the direct applicability of the work. These assumptions are clearly stated, but the expected consequences and limitations that these assumptions entail are not treated. For the paper to give a accurate picture of the contribution made and where further work is needed, I believe that such assumptions should be discussed as part of the paper.

**Response:** Thank you for your kind words and appreciation of our work. We also thank you for your feedback and, in the following, we provide our responses to your specific comments.

## Specific Comments

### 1. Assumption 1: No drivetrain loss

This assumption is obviously not realistic and will easily lead to a rotor power estimation error in the order of 10%. It would be beneficial to describe how this assumption could potential be lifted in order to show the feasibility using the proposed scheme in the presence of uncertain drivetrain losses.

**Response:** Thank you for your feedback regarding Assumption 1. In this work, first and foremost, our aim was to establish an analysis framework of a power balance wind speed estimation method. This involves segretation between aerodynamic power estimation and wind speed solving submodules and finding the optimal combination given multiple options for each and introduction of a calibration method across a range of turbine sizes. Therefore, to make our derivations and analyses more straightforward and stay aligned with the main goal of our paper, we did not include any drivetrain losses in our original manuscript, thereby the inclusion of Assumption 1.

That said, we agree that a degree of realism can be further added to the first-principle modeling by including drivetrain losses. To this end, therefore, we include a generator efficiency factor in the revised manuscript. Please note that the inclusion of the generator efficiency has been incorporated in Sections 2-4, including Figs. 4, 5, 6, 11, and 12 of the revised manuscript. We also include an additional explanation in Section 4.1 in this regard.

Related to uncertainties in drivetrain losses, learning algorithms may perhaps be incorporated, for instance, by Gaussian process methods (Hart et al., 2018). This would require modification of the drivetrain model, accommodating uncertainties in the losses. As such additional complexities would require extra work and potentially drift the focus of our current study, we reserve such an extension for future work.

**Revised portions:**

- **(2) and the explanatory text that follows:**

“ ...

$$J\omega_r(t)\dot{\omega}_r(t) = P_r(t) - P_g(t)/\eta_g. \quad (2)$$

where  $J \in \mathbb{R}$  is the low-speed shaft (LSS) equivalent inertia,  $\omega_r \in \mathbb{R}$  the rotor angular speed, and  $P_g \in \mathbb{R}$  the generated power with the corresponding generator efficiency factor  $\eta_g \in (0, 1]$ . ...”

- **(8) and (14) as a result of the change in (2):**

$$\hat{P}_r(t) = J\omega_r(t)\hat{\dot{\omega}}_r(t) + P_g(t)/\eta_g. \quad (8)$$

$$\hat{P}_r(k) = J\tilde{\omega}_r(k)\tilde{\dot{\omega}}_r(k) + P_g(k)/\eta_g. \quad (14)$$

- **Third paragraph of Section 4.1.1 (note: including the change of steady-state power resulting from the inclusion of  $\eta_g = 0.94$ ):**

“... In addition, the inertia value of the NREL-5MW is used (see Table 1), under the steady-state operating conditions  $\bar{\omega}_r = 0.8$  rad/s and  $\bar{P}_g = 1.647$  MW, the latter of which is computed using (5) with  $C_p^* = 0.469$ ,  $\lambda^* = 6.53$ , and  $\eta_g = 0.94$ . ...”

- **Explanatory text following (15):**

“... where  $G \in \mathbb{R}^+$  is the gearbox ratio of the drivetrain,  $T_r = P_r/\omega_r$  is the aerodynamic torque, and  $T_g = P_g/(\eta_g\omega_rG)$  is the generator torque.”

- **Change in the aerodynamic power equation in Remark 4 as a result of the change in (2):**

“**Remark 4.** Similar to the numerical derivative-based method, the state estimation scheme above can provide the aerodynamic power estimate by making use of the relation  $\hat{P}_r = J\hat{\dot{\omega}}_r\hat{\omega}_r + P_g/\eta_g$ . ...”

- **Last paragraph of Section 4.3:**

“... as this will diminish and deteriorate the  $J\omega_r\dot{\omega}_r$  estimate such that  $\hat{P}_r \approx P_g/\eta_g$  (i.e. information will be lost). The case where  $J\omega_r\dot{\omega}_r = 0$  such that  $\hat{P}_r = P_g/\eta_g$  is demonstrated by the green line, ...”

• **Section 6.1, second paragraph:**

“... In contrast to using equal  $C_p$  tables in the previous analysis sections, using the reference wind turbine models in OpenFAST leads to simulating the aerodynamic properties of the respective turbines. For both turbines,  $\eta_g = 1$  is chosen. ...”

2. Assumption 2: Only below rated operation with constant pitch angle

This assumption could potentially make the results of the paper unobtainable in real conditions. The state of the art wind turbine control uses pitch extensively in the below rated region. For e.g. optimal power tracking outside the optimal lambda region, thrust peak shaving, noise reduction control, fore-aft tower damping.

The REWS is also critical for turbine control in the above rated region as various load reduction control techniques rely on accurate wind speed information. Ensuring that the estimator can work in above rated is therefore also of high importance.

From experience designing and tuning wind speed estimators assuming constant pitch angles can lead to poorly tuned wind estimators where the pitch angle signal contaminates the REWS estimate leading to poor dynamic performance. The tuning method procedure derived in this paper might therefore not work if this assumption is lifted.

A discussion on the consequences of lifting this assumption, the feasibility of the presented method when this assumption is lifted and possible mitigations would make the applicability of the method much clearer.

**Response:** Thank you for your remark regarding Assumption 2. We acknowledge the importance of blade pitch angle information to be accounted for in the proposed wind speed estimation framework. In our manuscript, we focus on analyzing the wind speed estimator in open-loop and, therefore, use the baseline  $K\omega_r^2$  controller strategy:

“... The drivetrain system outputs  $\omega_r$ , which is then fed into the optimal torque controller (Bossanyi, 2000), often known as the ‘ $K\omega_r^2$ ’ controller. However, partial-load controller design is not the main focus of this study; hence, the  $\overline{K\omega_r^2}$  controller is deemed sufficient for the goal of this work. ...”

Extending the current framework by including an extra input and considering blade pitch angle dependency of the  $C_p$  table inside the wind speed estimator should not be difficult. This approach has also been employed successfully by Lazzerini et al., (2024) and Zahle et al. (2024). For now, we retain the assumption, however, we

acknowledge the valuable suggestion of the reviewer for future formal analysis.

**Revised portions:**

• **Section 3.2, prior to (5):**

“... That said, this work is equally applicable to more advanced partial-load controllers available in the literature, such as tip-speed ratio tracking schemes, e.g., Brandetti et al. (2023) and Lazzerini et al. (2024). Note must be taken, however, that in the latter scheme, blade pitching is active in partial load. Thus, further study of the current scheme under varying pitch angles is required and reserved for future work. ...”

• **Section 7, last sentence:**

“... Future study will consider providing an optimal means for the estimator tuning, e.g., by Bayesian optimization, incorporating currently unmodeled dynamics, e.g., drivetrain torsion, tower dynamics, and dynamic inflow effects, and accounting for blade pitch information.”

3. Assumption 3: Accurate power coefficient

Assuming an accurate power coefficient is reasonable given clean blades, however the power coefficient model used in this paper is not suitable for modern very large wind turbine designs such as the IEA reference wind turbines used in this paper. The model neglects the substantial aerodynamic effects of rotor deflection which are especially prevalent in the below rated region.

The effect is not seen in the simulations as the ElastoDyn module is used for the blade beam models and this model does capture the torsion of the blades which is critical for the aerodynamic performance. Instead using the BeamDyn module would show the effect of blade deflection on the estimator performance.

Discussing this aspect would likely give a clear path for future work. The authors could even consider computing the  $C_p$  value for a few operating points of the IEA22MW turbine near the rated wind speed with and without blade deflection in order to discuss / assess the magnitude of the error induced

**Response:**

Thank you for your comment and suggestion. This is indeed a very valid point, and we thank the reviewer for raising it. Indeed, present-day large-scale turbines have blades with considerable flexibility under varying loads resulting in bending and twisting largely due to bend-twist coupling effects. In our work, the power coefficient is generated without considering significant deformations in terms of

deflection and structural twist of the blades, which might not produce the most accurate aerodynamic data with respect to real-world conditions, as the reviewer has inferred. Therefore, in our mid-fidelity simulations, we deactivate the BeamDyn module to prevent high inaccuracies between the generated power coefficient table and the actual coefficient of the rotor during simulations. Therefore, we have put in our best effort in terms of ensuring consistency between our data generation and simulation conditions.

That said, we acknowledge that having a more representable power coefficient table, followed by evaluation with the higher-fidelity structural module such as BeamDyn, would be beneficial in terms of real-world accuracy. One of the implications of incorporating a blade flexibility model into the aerodynamic power coefficient generation would require a redefinition of the  $C_p$  table as a function of tip-speed ratio  $\lambda = \omega_r R / U$  (where  $R$  is the rotor radius) into a function of rotor speed  $\omega_r$  and wind speed  $U$ . This is because different combinations of  $\omega_r$  and  $U$  would not give the same power coefficient due to changing aerodynamic properties as a result of blade bending and bend-twist coupling even though they produce the same  $\lambda$ . The previously mentioned approach involves extended steady-state calculations of the aerodynamic properties in steady state resulting from the added dimension and has been recently exposed and elaborately analyzed in the work of Lazzerini et al. (2024).

As discussed above, considerations in accounting for significant blade deformation in generating a power coefficient table will add complexity to our current analysis presented in the paper, for instance by replacing  $C_p(\lambda)$  into  $C_p(\omega_r, U)$ . Aligned with our earlier response on Assumption 1, our primary goal is to develop a framework for analyzing a power balance wind speed estimation method, identifying its optimal structure among subcomponent combinations, and calibrating it for different turbine sizes. Hence, we must limit the scope of our current analysis, and therefore, alterations in the behavior and performance of the proposed estimator under more flexible blades are subject to future study. Nevertheless, to enhance the clarity of our current work, we include a new remark in the revised manuscript as documented below.

**Revised portion, following (4):**

**“Remark 1.** The power coefficient considered in this work does not take into account the aerodynamic effects due to structural deformations, e.g., those associated with bend-twist coupling of the blades. Had this been the case, changes in local blade sections’ angle of attack are expected and different combinations of  $\omega_r$  and  $U$ , although they correspond to the same  $\lambda$ , might yield different power coefficients. This would render the one-on-one mapping between  $\lambda$  and  $C_p$  inadequate such that  $C_p : \mathbb{R}^2 \rightarrow \mathbb{R}$  mapping is needed (i.e.,  $C_p(\omega_r, U)$  instead of  $C_p(\lambda)$ ; see Lazerrini, et al. (2024) and references therein). Nevertheless, without loss

of generality, the mapping of the former is adopted for the sake of clarity of the analysis of this paper; thus, the  $C_p$  tables in this work are generated using rigid rotor assumption. "

## Technical Corrections

1. Seems that the Fast simulations are sometimes referred to as mid-fidelity, sometimes high-fidelity. e.g. line 85 and 95.

**Response:** Thank you for your comment. Throughout our paper, we refer to OpenFAST simulations as mid-fidelity, especially in the introduction and conclusion chapters. At times, we also refer to it as higher-fidelity to contrast it with the lower-fidelity simulations in Sections 4-5. Nevertheless, to prevent confusion, in the revised manuscript, we consistently use 'mid-fidelity.' Please see the attached marked-up version of the revised manuscript for details

2. Line 116 It is claimed that the reference turbines represent industrial turbine designs which is not accurate since these turbines are designed by academia. If you compare the relations of the listed quantities across industrially designed turbines I expect you will find a high variance.

**Response:** Thank you for raising this point. It is indeed true that the presented reference wind turbines are designed by academia. Moreover, we must acknowledge that whether the listed reference wind turbines in our original manuscript are representative of industrial turbine designs still requires more rigorous data collection from various original manufacturers and further study. Therefore, we remove the following statement in the revised manuscript.

**Revised portion in Section 2.2, at the beginning and the end of the section, respectively:**

~~"As mentioned earlier in Section 1, wind speed estimator calibration for real-world industrial turbines methodology for various wind turbine sizes is presented in this work.~~

...

~~As the reference wind turbines represent industrial turbine designs, it is expected that the derived fits hold acceptable prediction quality for industrial turbines."~~

3. Line 240 Often the "noise" seen on the speed measurement are unmodelled dynamics and not Gaussian white noise. Some of these unmodelled dynamics will be present in the fast simulation. The filtering chosen thus often needs to consider the unmodelled dynamics rather than the actual noise variance



**Response:** Thank you for your remark. We acknowledge that, in real wind turbine speed measurements, additional dynamic effects than what is modeled in our work can be observed and may deteriorate wind speed estimation if not fully accounted for.

We agree that including additional dynamics, such as additional drivetrain DOF, tower DOFs, unsteady aerodynamics, and any residual unmodeled dynamics such as noise, may further improve the wind speed estimation quality. As incorporating such dynamics in the current work would potentially deviate from its main focus, we intend to do this in the future, as we have already inferred in the revision below.

**Revised portion, last paragraph of Section 7:**

“ . . . Future study will consider providing an optimal means for the estimator tuning, e.g., by Bayesian optimization and incorporating currently unmodeled dynamics, e.g., drivetrain torsion, tower dynamics, and dynamic inflow effects. ”

4. Line 340 The turbulence intensity used for the simulations is very low. What justified using such low values?

**Response:** Thank you for your question. Although we present our work as a site-independent framework, we believe that 4% of turbulence intensity is a reasonable choice, e.g., for offshore sites (see, e.g., Van der Hoek et al. (2020) and Taschner, E. et al. (2023)). Furthermore, despite the use of low turbulence presented in the manuscript, we also performed simulations with higher turbulent wind cases, i.e., 12% to prove the efficacy and validity of our method. This number is a reasonable choice for onshore sites, as shown in the following figure.

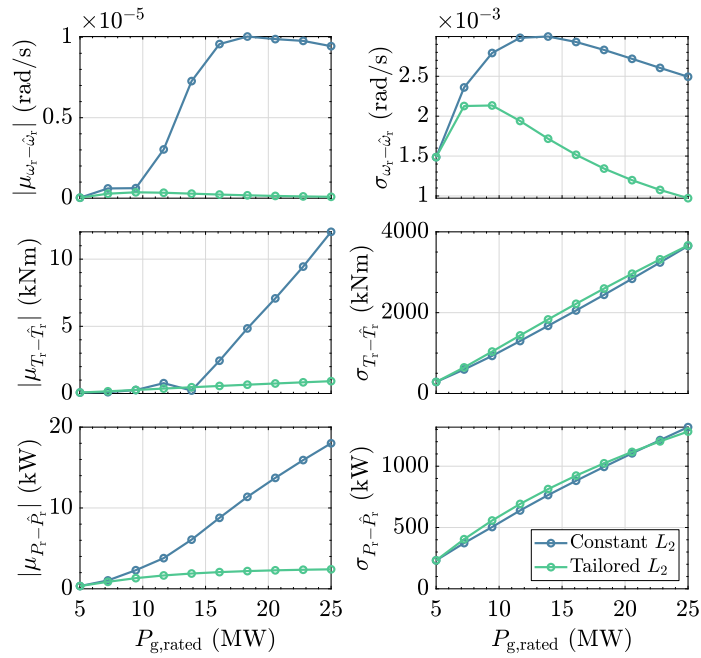

The above results show high similarities with respect to that of the 4% turbulence as shown in Fig. 5 of the original manuscript, despite the change in overall magnitudes. As we reach the same conclusions with the low turbulent case, we do not include the high-turbulent results in the paper.

- Figure 5: It would be beneficial to include the normalized power error and maybe even the cubic root of the normalized error as this should be proportional to the resulting error in estimated wind speed.

**Response:** Thank you for your comment. In the following figure, we plot the normalized aerodynamic power error and the corresponding wind speed estimate error, where tailored  $L_2$  gain setting is used and iterative single-step wind speed estimate solver is employed for the latter. On the left plot, we show the mean values and on the right plot, we depict the standard deviation values of both errors. The data (and the fitted lines) confirm your statement regarding the proportionality relationship between both errors in terms of mean and standard deviation.

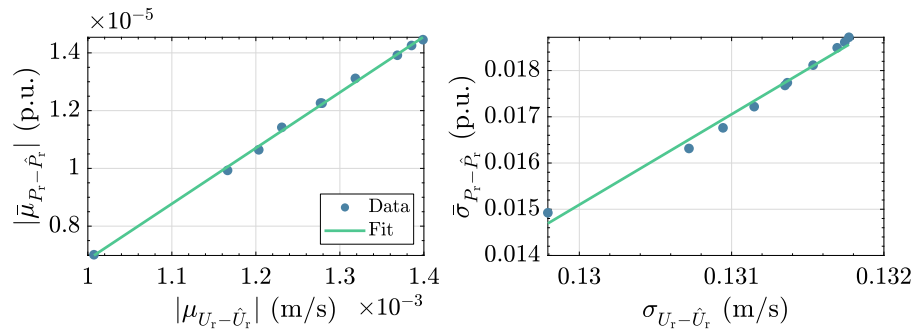

While this finding confirms your statement, we believe it serves as a supplementary validation to the core contributions of our work. Therefore we refrain from its inclusion in the revised manuscript.

6. Line 574 As part of assessing the performance of the estimator it would be beneficial to have step wind or gust simulation cases where it is easy to see the transient response e.g. lag. Minimizing the lag is very important for the turbine control in gust like scenarios.

**Response:** We appreciate the suggestion to demonstrate transient response in step wind or gust scenarios. However, transient characteristics are part of the dynamic tuning of the estimator, which would change for different tunings. Thus, we heavily focus on providing tuning rules and methodology for satisfactory estimator performance over a turbine range; the actual dynamic transient behavior is a design choice of the one implementing and calibrating the estimator.

7. Figure 13: A zoom would nice as the both the actual REWS and the I&I REWS have higher frequency content and it is not possible to see if they are actually correlated

**Response:** Thank you for your suggestion. We agree with you that zoomed-in insets would enhance the clarity of the plots, especially in providing information on whether the actual REWS and the I&I estimate are correlated. Therefore, in the revised manuscript, we changed Figs. 13 and 14 into the following to include zoomed-in plots. As can be seen in the 'Revised portions' below, some oscillations of the I&I REWS estimation seem to be correlated with that of the actual REWS with some lags. However, without additional tools, it is challenging to present any clear conclusions regarding the correlations of both signals. Therefore we do not do so in the current work to retain its conciseness and clarity.

**Revised portions:**

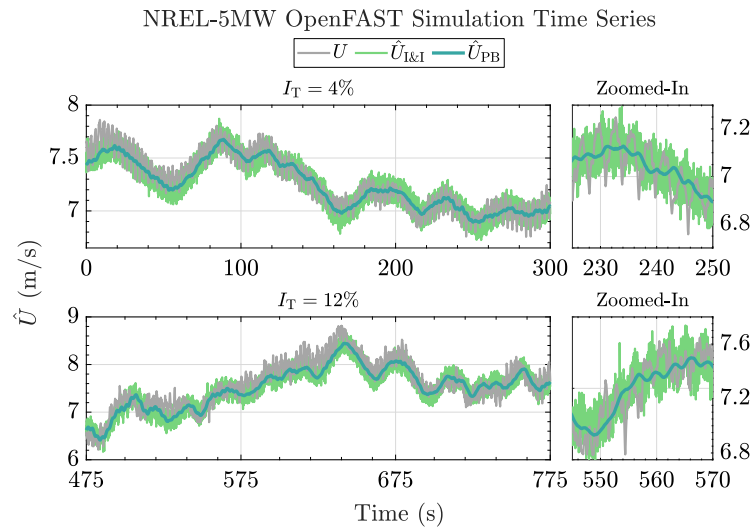

**Figure 13.** Wind speed estimation time series for the NREL-5MW wind turbine. The proposed method (blue line) gives a smooth, less noisy estimate compared to the I&I (green line) for both low (top plots) and high (bottom plots) turbulent cases. The low-frequency component of the wind speed is captured where biased estimation occasionally occurs, potentially due to an inaccurate  $C_p$  table utilized in both estimators and an absence of dynamic inflow modeling in the estimators. The actual REWS, as outputted by OpenFAST, is shown in the gray line. Zoomed-in plots of 25-s time spans are provided on the right for clearer observation of the estimation performance.

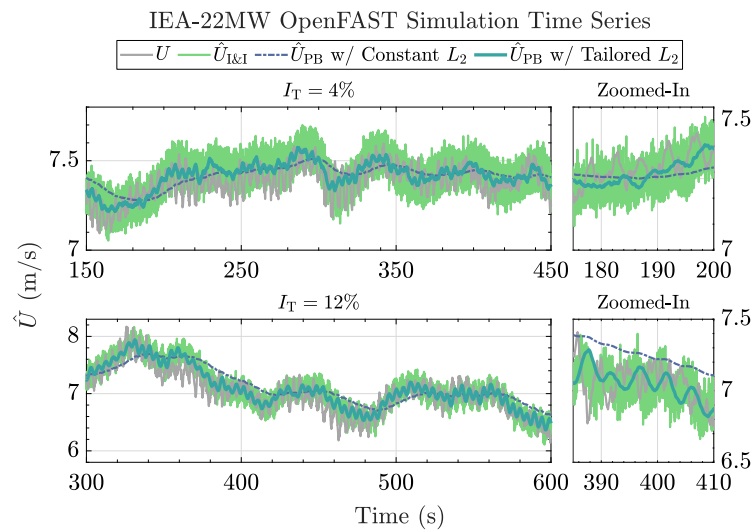

**Figure 14.** Wind speed estimation time series for the IEA-22MW wind turbine. The proposed method gives a smooth, less noisy estimate compared to the I&I (green line) for both low (top plots) and high (bottom plots) turbulent cases. Constant  $L_2$  (dashed dark blue line) results in lagged estimation compared to gain-tailored  $L_2$  (solid blue line). The actual REWS, as outputted by OpenFAST, is shown in the gray line. Zoomed-in plots of 25-s time spans are provided on the right for clearer observation of the estimation performance.

8. Figure 15: Very hard to read as the bars blue bars cover the green bars. Consider

changing from bars to lines, such that both distributions can easily be seen,

**Response:** Thank you for pointing this out. We agree that Fig(s) 15 (and 16) can be further improved by changing the presentation from bars to lines. Therefore the following figure has been used to replace Figures 15 (and 16).

**Revised portion:**

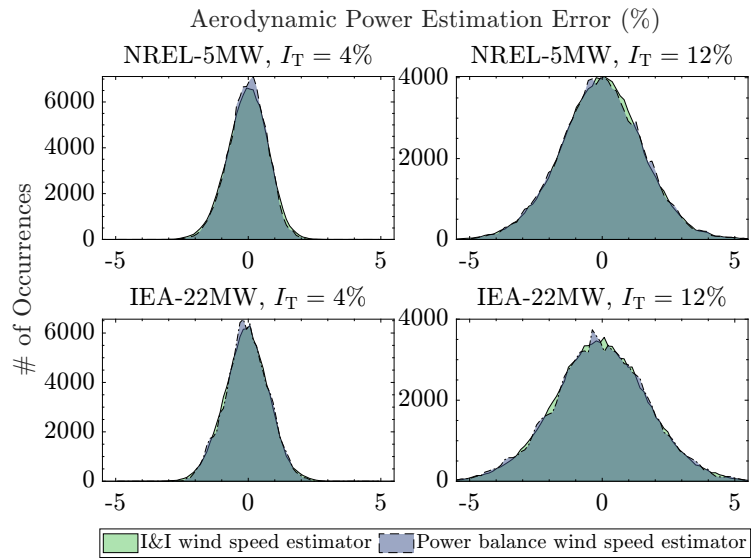

**Figure 15.** Aerodynamic power estimation error histograms of the wind speed estimators. Both the I&I and the proposed power balance wind speed estimator are shown to have similar aerodynamic power error distributions.

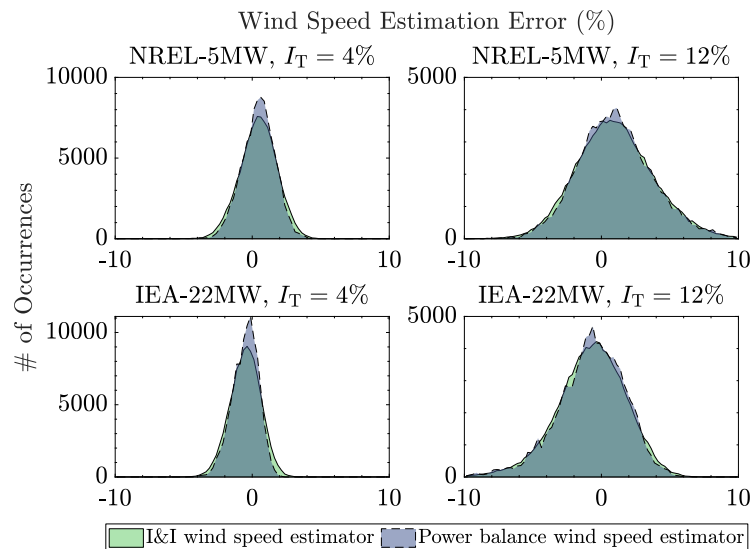

**Figure 16.** Wind speed estimation error histograms of the wind speed estimators. Both the I&I and the proposed power balance wind speed estimator are shown to have similar wind speed

estimation error distributions. Subtle differences are also shown for both the I&I and the proposed power balance wind speed estimator, where the former has slightly higher occurrences at the histograms' tails due to the higher noise level, while the latter has slightly higher occurrences at the center of the distributions.

## References:

Hart, E., Leithead, W. E., and Feuchtwang, J.: Wind turbine  $C_{p,max}$  and drivetrain-losses estimation using Gaussian process machine learning, *J. Phys.: Conf. Ser.*, 1037, 032024, <https://doi.org/10.1088/1742-6596/1037/3/032024>, 2018.

Hoek, D. van der, Doekemeijer, B., Andersson, L. E., and Wingerden, J.W. van: Predicting the benefit of wake steering on the annual energy production of a wind farm using large eddy simulations and Gaussian process regression, *J. Phys.: Conf. Ser.*, 1618, 022024, <https://doi.org/10.1088/1742-6596/1618/2/022024>, 2020.

Lazzerini, G., Deleuran Grunnet, J., Gybel Hovgaard, T., Caponetti, F., Datta Madireddi, V., De Tavernier, D., and Mulders, S. P.: COFLEX: A novel set point optimiser and feedforward-feedback control scheme for large flexible wind turbines, *Wind Energy Science Discussions*, 2024, 1–35, <https://doi.org/10.5194/wes-2024-151>, 2024.

Taschner, E., van Vondelen, A., Verzijlbergh, R., and van Wingerden, J.W.: On the performance of the helix wind farm control approach in the conventionally neutral atmospheric boundary layer, *J. Phys.: Conf. Ser.*, 2505, 012006, Zahle, F., Barlas, A., Loenbaek, K., Bortolotti, P., Zalkind, D., Wang, L., Labuschagne, C., Sethuraman, L., and Barter, G.: Definition of the IEA Wind 22-Megawatt Offshore Reference Wind Turbine, Technical University of Denmark, <https://doi.org/10.11581/DTU.00000317>, 2024.

## Response to Reviewer 2

The paper discusses the topic of estimating the wind speed for wind turbines, the topic is relevant to wind energy industry. The paper is clear and well written, and it add a contribution to the field of wind turbine wind speed estimation, the methods used to develop both the aerodynamic power estimator and wind speed estimate solver has been well implemented and described.

**Response:** Thank you for the kind words and appreciation given to our work. In the following we provide our responses to your comments.

Nevertheless, the assumptions of neglecting the power losses between the generator and the gearbox of the wind make the method developed not suitable for direct implementation, the efficiency of the drivetrain can be added to the problem in future study based on the outcomes of this work.

**Response:** Thank you for your comment. In the original manuscript, we did not account for the losses between the generator and the gearbox of the wind turbine. However, in the revised manuscript, we have addressed this issue by lifting the assumptions, specifically Assumption 1, as detailed in our response to Reviewer 1's Specific Comment No. 1. We kindly refer you to that response for further clarification.

There are minor typos observed in the manuscript as follow: 1- Page 3 line 76 "...outlines the contributions of this work" a colon (:) could be added after 'work'. 2- Page 7 line 157, the expression at the end of the line exceeds the page margin. 3- The front size in figures [1, 4 - 6, 8, 9, 11 - 16] is small and could be enlarged.

**Response:** Thank you for pointing these out. In the revised manuscript, we have applied changes to improve the readability of our paper, including: (1) adding a colon on page 3 line 76, (2) fixing the page margin exceeded by the expression at the end of line 157 of page 7, and (3) increasing the font size in figures [1, 4 - 6, 8 - 16]. Please also note that we altered the width vs. height ratio of Figs. 6, 11, and 12 in the revised manuscript to reduce whitespace while still maintaining clarity.

## Response to Reviewer 3

The paper addresses the topic of wind estimation, which is of great relevance in wind turbine engineering, and uses a systematic approach and well-known tools such as Kalman filters and Luenberger estimators. Besides, the method has been validated using aeroelastic simulations. However, some important issues should be addressed before the paper is published:

1. The introduction states that many wind turbine control structures are based on wind estimators. However, this is far from true. Wind turbine controllers are mainly based on the feedback of generator speed and nacelle acceleration because wind measurements and estimates should not be trusted or have to great a delay. How does the proposed method change this scenario?

**Response:** Thank you for your question. While it is true that many wind turbine controllers rely heavily on feedback from generator speed and nacelle acceleration, the statement in the introduction has already provided evidence referring to the growing body of research and emerging wind turbine control approaches incorporating wind speed estimators. These methods, though they might not be universally adopted, are gaining traction due to advancements in estimation techniques and their potential to improve performance in certain scenarios. Further evidence has also been found in recent publications, which we have included in the revised manuscript:

- (a) In the work of Brandetti et al. (2023), the authors provide a rigorous study on the comparison between wind speed estimate-tip-speed ratio (WSE-TSR) tracking scheme and a baseline  $K\omega_r^2$  controller. It is shown that the WSE-TSR scheme provides more flexibility compared to the baseline controller (which solely relies on generator speed measurements) in terms of power and load objectives trade-off;
- (b) In the work of Lazzerini et al. (2024), the authors propose a novel feedforward-feedback control scheme that leverages optimal operational set points computed by an optimizer accounting for the effects of blade deformations on the aerodynamic performance and turbine loading. In their proposed scheme, the authors utilize wind speed estimates to schedule their proposed controller to track the generated optimal set points, as well as to schedule a set point smoother for a smooth partial-full load transition. This work has been established in collaboration with an industry partner;
- (c) The Reference Offshore Open-Source Controller (ROSCO) (Abbas et al., 2022)—developed to represent industrial standards—provides wind speed estimation as a means to provide wind speed information to a tip-speed ratio tracker torque controller, not to mention a pitch saturation routine.



(d) The power balance wind speed estimation scheme that we proposed has been utilized in previous studies in Mulders et al. (2023a) and Mulders et al. (2023b), where the combination of numerical derivative-based aerodynamic power estimator and continuous wind speed estimate solver is chosen as the structure of the estimator. Therein, the wind speed estimate is leveraged in a WSE-TSR tracking scheme to provide the optimal reference for tracking the optimal TSR at the partial-load regime. In these studies, however, the authors focus on  $C_p$  learning algorithms development and not on the analysis of the power balance wind speed estimator itself. These works (and our current work) have also been established in collaboration with an industry partner.

With regard to wind speed estimation delays/lags, Section 4 of our study has been dedicated to the analysis of such undesired behavior. Particularly, we have identified that information lack due to excessive noisy measurement filtering in the numerical derivative-based aerodynamic power estimation would lead to  $\hat{P}_r \approx P_g/\eta_g$ , which is the worst-case lag scenario as presented in Fig. 6. As such a lag would entail a lagged wind speed estimate, we propose the state estimation-based aerodynamic power estimator as a viable alternative. This is because the estimation performance can be tuned intuitively by choosing appropriate natural frequency and damping ( $\omega_0$  and  $\zeta_0$ ) as elaborated in Section 4.3 such that minimum delays/lags can be obtained while achieving overall high estimation accuracy. The resulting wind speed estimate thus becomes a reliable and valuable signal for augmentation with controllers (the cases of which have been demonstrated in the aforementioned literature, as well as in Section 1 of our manuscript).

We hope this clarifies our perspective.

### Revised portion, second paragraph of Section 1:

“Regardless of the potential economic benefit, the task of controlling wind turbines with larger rotors is becoming more of a challenge, especially when accurate information on wind speed is crucial to ensure high controller performance, e.g., for gain-scheduling (Kumar and Stol, 2009; Koerber and King, 2013), feedforward(-feedback) control (Van Engelen and Van der Hooft, 2003; Koerber and King, 2013; Lazzarini et al., 2024), or tip-speed ratio tracking (Bossanyi, 2000; Ortega et al., 2013; Abbas et al., 2022; Brandetti et al., 2022, 2023), to mention a few...”

2. What is the main purpose of the proposed wind estimate? If it is going to be used for control purposes, how does the estimator block improve performance? As the control action is going to be based on the generator speed either way, why is a two step procedure (estimator+controller) a better option than the standard feedback? How does the main purpose affect the requirements on the estimated signal?

**Response:**

Thank you for your questions. One of the main purposes of the proposed wind speed estimate is indeed for control purposes, as you have indicated. Nonetheless, in our work, the used controller ( $K\omega_r^3$ ) is solely reliant on the generator speed and does not use any wind speed information, as you have also inferred. This is done purposefully to allow as clear as possible analysis of our proposed estimator in an open loop—free from controller interferences, similar to what was done in the literature, e.g., Østergaard et al., (2007) and Soltani et al., (2013). That being said, we, in contrast to the reviewer’s observation, see a large industrial traction for advanced controllers including the wind speed estimator and tip-speed ratio tracking (WSE-TSR) schemes. The use of such a controller is illustrated by the works mentioned above. Nevertheless, several aspects of the estimator remained unclear, which we aimed to address in our current work, such as

- (a) how the *estimated signal* would look like under noisy measurements;
- (b) how the estimator should be calibrated across different turbines such that the *estimated signal* is representative with respect to the sizes of the turbines in question;
- (c) whether or not there are better alternatives (thus more optimal estimator structure and better-conditioned resulting *estimated signal*) than the existing aerodynamic power estimator and wind speed estimate solver.

The answer to the reviewer’s question on whether a two-step procedure is a better option than the standard feedback might lie in the study of Brandetti et al. (2023). In the study, the authors investigated a WSE-TSR tracking procedure akin to that used in Mulders et al. (2023a) and Mulders et al. (2023b) and made a comparison with a standard  $K\omega_r^2$  controller—with the Immersion and Invariance wind speed estimator being used in place of the power balance estimator. The authors demonstrate in that work that by having such a combined estimator-controller scheme, more freedom in dynamic controller tuning is attained. Moreover, there are greater possibilities in reaching optimal actuation and performance trade-offs, for example limiting generator torque fluctuation and maximizing power production, these optimal solutions are illustrated by Pareto fronts by virtue of additional tuning parameters the framework provides.

3. The estimator is based on the idea that both the inertia and the  $cP$  are known values. Is that a realistic approach? Have the authors performed a sensitivity analysis?

**Response:** Thank you for your questions. When a turbine is newly manufactured, the modeled inertia  $J$  and power coefficient  $C_p$  are believed to be good estimates of the actual properties of the turbine. However, these properties may change over the lifetime of the turbine due to various causes of degradation. A change of  $J$ , according to our framework, would result in a change in the dynamics of the state estimation-based aerodynamic power estimator, in particular, the esti-

mator gain  $L_2$  would no longer be accurate as it is parameterized by  $J$ , as shown in (22b). Having an estimate of  $J$  from field tests, for instance, by deceleration test (Paniagua and Yasa, 2007; Ilina, 2011; and Jager, 2017), one may retune  $L_2$  based on (22b).

With regard to  $C_p$  value learning, the work of Mulders et al. (2023a) and Mulders et al. (2023b), for instance, have provided several learning algorithms for  $C_p$  table calibration given the inaccuracies that might occur in real-world setups. The former of which proposes a wind speed measurement-free approach, whereas the latter proposes an excitation-free and data-driven  $C_p$  calibration approach. Moreover, in the work of Brandetti et al. (2022), sensitivity analysis on the effect of inaccurate  $C_p$  table on wind speed estimation has been studied, where biased estimates might result from the inaccuracy of the coefficient. Estimating such quantities, however, falls within the scope of the parameter estimation and learning control field and is not the focus of our current work; therefore, the reviewer is referred to the aforementioned works for more details.

4. The paper says that high power wind turbines show great wind speed variance across the rotor. How does it affect the estimation? Would it make sense to focus on blade effective wind speed?

**Response:** Thank you for your question. The greater the rotor area of a wind turbine, the greater the wind speed variation across the rotor. The whole concept of rotor-effective wind speed (REWS) is, therefore, to capture this effect in a single quantity—capturing the spatial variation effects (e.g., from shear, veer, etc.).

Blade-effective wind speed (BEWS) is another means to capture such spatial variance, for instance, by exploiting blade load measurements and the so-called cone coefficient, the detail of which is provided in the literature, such as the work of Liu et al. (2022). However, whether BEWS is required needs further context and justification as it is needed mostly for more sophisticated control objectives such as blade load mitigation by individual pitch control (e.g., as done in Pamososuryo et al., (2023)), whereas REWS is already sufficient for most control purposes, such as tip-speed ratio tracker torque controller (Brandetti et al., (2023) and Lazzerini et al., (2024)), and blade pitch saturation (Abbas et al., 2022), to mention a few. Based on this reasoning, we focus on the development of the proposed REWS estimator.

5. Section 4.1 proposes a first order filter to eliminate measurement noise. Could the time constant be chosen by characterizing the spectrum of the sensor noise and the generator speed? Maybe a frequency domain analysis could be a useful guide.

**Response:** Thank you for your question. It is indeed possible to choose the time constant by characterizing the spectrum of the sensor noise and the generator speed and then setting the cut-off frequency of the filter accordingly. In Section 4.1 we have provided a measurement noise-time constant sweep, in which we can observe the trade-off between the noise filtering and biased estimate. Later on in Section 4.3, we compare this method with the state estimation-based approach, in which the latter is shown to be much more effective and noise-resilient. Therefore, we do not include additional studies of the filtered derivative parameter characterization in our work, as it is of less interest.

6. The grammar should be reviewed, specifically the use of the Saxon genitive for nonanimate subjects and the subject-verb agreement.

**Response:** Thank you for your feedback. In the revised manuscript, we have made improvements wherever possible with regard to the misuse of the Saxon genitive in the previous version of our work. Subject-verb agreements have also been improved in the revised manuscript. Please refer to our marked-up version of the revised manuscript to see the detailed changes.

## References

- Abbas, N. J., Zalkind, D. S., Pao, L., and Wright, A.: A reference open-source controller for fixed and floating offshore wind turbines, *Wind Energy Science*, 7, 53–73, <https://doi.org/10.5194/wes-7-53-2022>, 2022.
- Brandetti, L., Liu, Y., Mulders, S. P., Ferreira, C., Watson, S., and van Wingerden, J.W.: On the ill-conditioning of the combined wind speed estimator and tip-speed ratio tracking control scheme, *J. Phys.: Conf. Ser.*, 2265, 032085, <https://doi.org/10.1088/1742-6596/2265/3/032085>, 2022. Brandetti, L., Mulders, S. P., Liu, Y., Watson, S., and van Wingerden, J.W.: Analysis and multi-objective optimisation of wind turbine torque control strategies, *Wind Energy Science*, 8, 1553–1573, <https://doi.org/10.5194/wes-8-1553-2023>, 2023.
- Ilina, I. D.: Experimental determination of moment to inertia and mechanical losses vs. speed, in electrical machines, in: 2011 7th International Symposium On Advanced Topics In Electrical Engineering (ATEE), 2011 7th International Symposium On Advanced Topics In Electrical Engineering (ATEE), 1–4, 2011.
- Jager, S. M.: Control Design and Data-Driven Parameter Optimization for the DOT500 Hydraulic Wind Turbine, 2017.
- Lazzerini, G., Deleuran Grunnet, J., Gybel Hovgaard, T., Caponetti, F., Datta Madireddi, V., De Tav-

ernier, D., and Mulders, S. P.: COFLEX: A novel set point optimiser and feedforward-feedback control scheme for large flexible wind turbines, <https://doi.org/10.5194/wes-2024-151>, 20 November 2024.

Liu, Y., Pamososuryo, A. K., Mulders, S. P., Ferrari, R. M. G., and van Wingerden, J.W.: The Proportional Integral Notch and Coleman Blade Effective Wind Speed Estimators and Their Similarities, *IEEE Control Systems Letters*, 6, 2198–2203, <https://doi.org/10.1109/LCSYS.2021.3140171>, 2022.

Mulders, S. P., Brandetti, L., Spagnolo, F., Liu, Y., Christensen, P. B., and van Wingerden, J. W.: A learning algorithm for the calibration of internal model uncertainties in advanced wind turbine controllers: A wind speed measurement-free approach, in: 2023 American Control Conference (ACC), 2023 American Control Conference (ACC), San Diego, CA, USA, 1486–1492, <https://doi.org/10.23919/ACC55779.2023.10156125>, 2023a.

Mulders, S. P., Liu, Y., Spagnolo, F., Christensen, P. B., and van Wingerden, J.W.: An iterative data-driven learning algorithm for calibration of the internal model in advanced wind turbine controllers, *IFAC-PapersOnLine*, 56, 8406–8413, <https://doi.org/10.1016/j.ifacol.2023.10.1035>, 2023b.

Østergaard, K. Z., Brath, P., and Stoustrup, J.: Estimation of effective wind speed, *Journal of Physics: Conference Series*, 75, <https://doi.org/10.1088/1742-6596/75/1/012082>, 2007.

Pamososuryo, A. K., Liu, Y., Gybel Hovgaard, T., Ferrari, R., and van Wingerden, J.W.: Convex economic model predictive control for blade loads mitigation on wind turbines, *Wind Energy*, 26, 1276–1298, <https://doi.org/10.1002/we.2869>, 2023.

Paniagua, G. and Yasa, T.: Accurate Turbine Inertia Measurement, *Exp Mech*, 47, 693–700, <https://doi.org/10.1007/s11340-006-9031-7>, 2007.

Soltani, M. N., Knudsen, T., Svenstrup, M., Wisniewski, R., Brath, P., Ortega, R., and Johnson, K. E.: Estimation of rotor effective wind speed: A comparison, *IEEE Transactions on Control Systems Technology*, 21, 1155–1167, <https://doi.org/10.1109/TCST.2013.2260751>, 2013.

# Analysis and calibration of optimal power balance rotor-effective wind speed estimation schemes for large-scale wind turbines

Atindriyo Kusumo Pamososuryo<sup>1</sup>, Fabio Spagnolo<sup>2</sup>, and Sebastiaan Paul Mulders<sup>1</sup>

<sup>1</sup>Delft Center for Systems and Control, Delft University of Technology, Mekelweg 2, 2628 CD Delft, The Netherlands

<sup>2</sup>Vestas Wind Systems A/S, Hedeager 42, 8200 Aarhus N, Denmark

**Correspondence:** Atindriyo Kusumo Pamososuryo (A.K.Pamososuryo@tudelft.nl)

**Abstract.** ~~Modern wind turbines' size growth~~ The size growth of modern wind turbines creates challenges in their control system design, particularly due to greater wind variability across larger rotor areas. As modern turbine control systems rely on the availability of accurate wind speed information, the increasing unrepresentativeness of pointwise measurement devices, such as anemometers, necessitates the incorporation of more representative rotor-effective wind speed (REWS) estimation.

5 Classical REWS estimators, based on static power relations, often fail to account for dynamic changes, leading to inaccurate estimation. To overcome these challenges, this paper introduces a power balance-based REWS estimation framework and splits the estimation problem into two modules: an *aerodynamic power estimator* and a *wind speed estimate solver*. Two possible aerodynamic power estimation techniques are discussed based on *numerical derivative* and *state estimation*. As state estimator calibration remained a challenge for varying wind turbine sizes, a gain-tailoring method for the performance calibration

10 throughout a range of modern wind turbine sizes has been derived for the state estimation-based aerodynamic power estimator. Two types of wind speed estimate solvers are analyzed, namely the *continuous* and *iterative single-step* methods. From the two modules, the best-performing methods—the state-estimation aerodynamic power estimator and iterative single-step wind speed solver—are chosen to form the optimal power balance REWS estimator. The combined optimal estimator is validated through OpenFAST simulations of the NREL-5MW and IEA-22MW turbines and compared against a baseline method. The

15 proposed method demonstrates good tracking of the REWS, better noise resilience, and convenient estimator gain calibration across different turbine sizes.

## 1 Introduction

With the increasing demand for clean and renewable wind energy for the provision of electricity worldwide, there is a trend to upscale wind turbine sizes (Global Wind Energy Council, 2024). Greater wind turbine rotor swept areas enable more wind

20 energy to be harnessable, resulting in increasing power production per unit turbine and effectively lowering the so-called levelized cost of energy—thus making wind turbines more competitive in the energy market (Burton et al., 2011; Veers et al., 2019).

Regardless of the potential economic benefit, the task of controlling wind turbines with larger rotors is becoming more of a challenge, especially when accurate information ~~of~~ on wind speed is crucial to ensure high controller performance, e.g., for

25 gain-scheduling (Kumar and Stol, 2009; Koerber and King, 2013), feedforward control (Van Engelen and Van der Hooft, 2003; Koerber and  
(-feedback) control (Van Engelen and Van der Hooft, 2003; Koerber and King, 2013; Lazzerini et al., 2024), or tip-speed ratio  
tracking (Bossanyi, 2000; Ortega et al., 2013; Brandetti et al., 2022) (Bossanyi, 2000; Ortega et al., 2013; Abbas et al., 2022; Brandetti et al.  
, to mention a few. This is mainly caused by the greater spatial variability across the rotor-swept area for larger turbines. Thus,  
pointwise wind speed information, such as provided by anemometers downstream at the nacelle, becomes increasingly unre-  
30 presentative, not to mention the presence of highly perturbed wind flow by the rotating turbine blades (Soltani et al., 2013). On  
the other hand, being the main driving force of a wind turbine, the deduction of more representative wind speed information  
via the turbine dynamics has been seen as a viable alternative (Boukhezzar and Siguerdidjane, 2011). To be more exact, other  
available measurements, namely rotor speed, generator torque signal, and blade pitch position, can be made use of to provide  
the so-called rotor-effective wind speed (REWS) estimate (Østergaard et al., 2007).

35 Early REWS estimation studies (see Østergaard et al. (2007); Soltani et al. (2013) and references therein), for a large part,  
utilize the static relation between the produced power and the REWS by omitting the always-occurring dynamical changes in  
the rotor speed. Resultingly, these REWS estimators cannot provide accurate estimations of the aerodynamic torque in transient  
conditions due to the neglected dynamic information.

To address the aforementioned shortcoming, later REWS estimation studies, incorporating the rotor acceleration informa-  
40 tion in their framework, arose in the literature. In Bossanyi (2000), the REWS estimate is obtained by firstly estimating the  
aerodynamic torque by reformulation of torque balance drivetrain dynamics, which account for rotor acceleration and drive-  
train inertial information. Then, given a priori knowledge of the aerodynamic torque coefficient table, it is possible to deduce  
the information on the wind speed<sup>1</sup>. The work of Van Engelen and Van der Hooft (2003) and Boukhezzar and Siguerdidjane  
(2011) adopt a similar estimation approach, where for the wind speed estimate solver, the Newton-Raphson algorithm, being  
45 an *iterative single-(time)step* method, is utilized. In Ortega et al. (2013), an Immersion and Invariance method for the wind  
speed estimation is employed and its global convergence guarantee is provided. This method seeks to nullify the error between  
measured rotor speed and its estimate, the latter being the integrated difference between (inertia-scaled) generator torque and  
aerodynamic torque estimate, by a proportional compensator (plus an integrator, as extended by Liu et al. (2022)). Having  
canceled the rotor speed estimation error, the wind speed estimate is then obtained in a *continuous* manner. The continuous  
50 method, in comparison with the iterative method, is considered to be a ~~multiple-time-step~~ multiple-time-step solving scheme.

Nevertheless, stability analysis of the continuous solver following a discretization has remained unaddressed, to the best of  
the authors' knowledge. Moreover, the performance comparison between the two wind speed estimation solving methods has  
received little attention in the literature.

With regard to the aerodynamic torque or power estimator, the work of Østergaard et al. (2007) is of particular interest.  
55 Two ways to obtain the aerodynamic torque estimate are studied therein, namely by (filtered) *numerical derivative* or by  
*state estimation*. The former is associated with the numerical differentiating method used to obtain rotor acceleration estimate

---

<sup>1</sup>In Bossanyi (2000), the information on the tip-speed ratio corresponding to the estimated aerodynamic torque is the main estimation output. Thus, given  
rotor speed measurements, the wind speed estimate can be straightforwardly derived from this tip-speed ratio estimate (as explained in Østergaard et al.  
(2007)).

from measured rotor speed. This provides a necessary ‘ingredient’ to reconstruct aerodynamic torque given a priori inertia information and generator torque input. The latter method provides two cascaded observers. The inner loop estimates the unmeasurable turbine states by Kalman filtering, while the outer one estimates the aerodynamic torque by a proportional-integral compensator structure. Although performance comparisons of both methods are provided, little attention was paid to the effect of noisy measurements on the aerodynamic torque estimators, which might deteriorate the ensuing wind speed estimation. To facilitate calibration of wind speed estimation by state estimation, the work of Moustakis et al. (2019) proposed a machine-learning-based Bayesian optimization approach. Nonetheless, since it remained unclear how to properly tune such a wind speed estimator, a Bayesian optimization approach, which is a global optimization machine learning algorithm, was adopted in the study.

However, optimal wind speed estimator tuning for a single turbine might not necessarily translate into optimal performance when applied to a different turbine. Given the accelerated growth in modern wind turbine sizes, there is a need to derive a calibration methodology to ensure optimal estimator tuning throughout these turbines.

Furthermore, based on the above literature review, four possible combinations of aerodynamic torque (or aerodynamic power, as made clearer shortly) estimator and wind speed estimate solver can be constructed with the optimal combination left undetermined. Moreover, validation in realistic simulation settings of such an optimal wind speed estimator combination—calibrated for wind turbines of various sizes—needs to be performed. It is also worth noting that the aforementioned works on various wind speed estimator schemes are based on the torque balance modeling of the wind turbine drivetrain. While utilizing such torque-based coordinates has been widely used for wind turbine control designs in the literature, employing power-based terms to represent the wind turbine dynamics is commonly used within the industry (Hovgaard et al., 2015; Odgaard et al., 2017; Brandetti et al., 2022; Mulders et al., 2023a; Pamososuryo et al., 2023). The current work thus provides a wind speed estimator framework, for a major part, in terms of power balance dynamics. That said, adopting this work into the torque balance framework is straightforward. The following outlines the contributions of this work:

1. Provide a thorough analysis for numerical derivative- and state estimation-based aerodynamic power estimators given noisy measurement settings;
2. Formalizing a calibration methodology for state estimation-based aerodynamic power estimator for a range of modern wind turbine sizes;
3. Deriving iterative and continuous wind speed estimate solvers, while providing frequency-domain stability analysis for the latter mentioned method;
4. Identifying the optimal wind speed estimator structure out of the proposed aerodynamic power estimators and wind speed estimate solvers;
5. Provide a mid-fidelity validation of the selected optimal estimator under realistic conditions for multiple wind turbine sizes.



The remainder of this paper is structured as follows: In Section 2, preliminaries required for this paper, being the notation convention, key reference wind turbine properties, and assumptions used throughout the paper, are explained. Section 3 touches upon the closed-loop wind turbine model and the proposed power balance REWS estimation framework. Section 4 and 5 covers several potential options for the aerodynamic power estimator and wind speed estimate solver subcomponents, respectively, where thorough analyses and low-fidelity numerical demonstrations are given. In Section 6, the proposed combination of the aerodynamic power estimator and wind speed estimate solver subcomponents are validated using higher-fidelity wind turbine simulation results. Finally, the conclusions and recommendations of this work are laid out in Section 7.

## 2 Preliminaries

### 2.1 Notations

In this section, frequently used notations in this paper are defined. Time dependency in the continuous domain is indicated by the time variable  $t$  and in the discrete-time domain by the time-step variable  $k$ . Quantities in the continuous frequency/Laplace domain are indicated by  $s$  notation and those in the discrete  $z$ -domain with  $z$ . A signal's ~~The~~ first time-derivative of a signal is denoted by  $(\dot{\bullet})$ , the  $(\hat{\bullet})$  notation indicates an estimated quantity,  $(\bar{\bullet})$  indicates a quantity at its steady-state, and  $(\tilde{\bullet})$  denotes a signal corrupted by noise. Constants associated with the optimal power coefficient, design tip-speed ratio, and fine pitch angle are indicated by  $(\bullet^*)$ .

### 2.2 Key Reference Wind Turbine Properties

As mentioned earlier in Section 1, wind speed estimator calibration ~~for real-world industrial turbines~~ methodology for various wind turbine sizes is presented in this work. Therefore, a wide range of wind turbine power capacities, which are at the present day represented by the available reference wind turbine models ranging from 5 to 22MW, is considered to showcase the applicability of the current study on a wide range of relevant-sized wind turbines. For that purpose, several reference wind turbines are considered in this study and their key physical properties are summarized in Table 1.

For later convenience, empirical relations have been derived between the ~~turbines'~~ rotor diameters  $D$ , power ratings  $P_{g,\text{rated}}$ , as well as ~~their~~ the low-speed-shaft equivalent inertias  $J$  of the turbines. By drawing such relations, it is possible to account for more turbine dimensions, power ratings, and inertias other than ~~that~~ those of the reference turbines. To this end, the key properties of the reference wind turbines in Table 1 are made use of to obtain the following fitted functions

$$J(D) = (2.581 \cdot 10^6 \cdot e^{0.02024D}) \quad \text{kg m}^2, \quad (1a)$$

$$P_{g,\text{rated}}(D) = (1.491 \cdot 10^6 \cdot e^{0.009613D}) \quad \text{W}, \quad (1b)$$

$$J(P_{g,\text{rated}}) = (9.979 \cdot 10^7 P_{g,\text{rated}}^2 + 2.843 \cdot 10^8 P_{g,\text{rated}} + 2.424 \cdot 10^8) \quad \text{kg m}^2. \quad (1c)$$

**Table 1.** ~~Reference wind turbines' key~~ Key physical properties of reference wind turbines. Those of the NREL-5MW are taken from Jonkman et al. (2009), the IEA-10MW from Bortolotti et al. (2019), the IEA-15MW from Gaertner et al. (2020), and the 22MW turbine from Zahle et al. (2024).

| Turbine parameter                               | Reference wind turbine |             |             |               |
|-------------------------------------------------|------------------------|-------------|-------------|---------------|
|                                                 | NREL-5MW               | IEA-10MW    | IEA-15MW    | IEA-22MW      |
| Rated power, $P_{g,\text{rated}}$ (MW)          | 5                      | 10          | 15          | 22            |
| Rotor diameter, $D$ (m)                         | 126                    | 198         | 240         | 280           |
| LSS-equivalent inertia, $J$ ( $\text{kg m}^2$ ) | 43,702,538             | 160,342,052 | 312,456,272 | 752,272,514.5 |
| Gearbox ratio, $G$ (—)                          | 97                     | 1           | 1           | 1             |

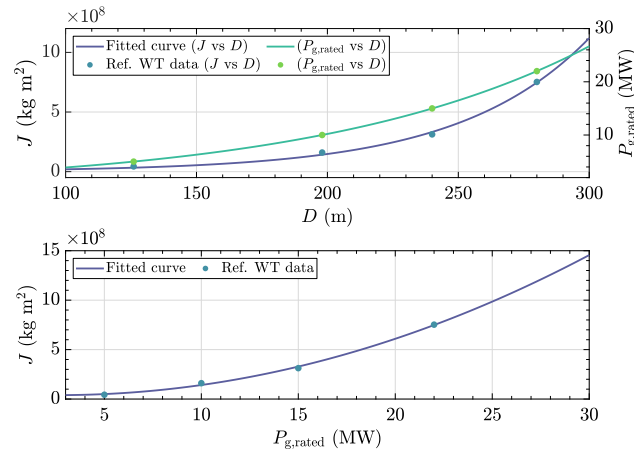

**Figure 1.** Curve fitting results. Reference wind turbine datapoints are depicted by the dots and the fitted curves are indicated by the lines. The top plot is the mapping from the rotor diameter to the inertia (left y-axis) and rated generator power (right y-axis). The bottom plot is the mapping from the rated generator power to the inertia.

For the above fits, the coefficient of determination  $\mathcal{R}^2 > 0.99$  is ensured. ~~As the reference wind turbines represent industrial turbine designs, it is expected that the derived fits hold acceptable prediction quality for industrial turbines.~~

## 120 2.3 Assumptions

~~There are no electromechanical losses in the drivetrain; that is, the generator and gearbox efficiencies are assumed to be 100%.~~

**Assumption 1.** *The wind turbines analyzed in this study operate solely in the partial-load (below-rated) region, where the generator power is controlled. The blade pitch angle is set to its constant fine pitch position. Consequently, the power coefficient*  
 125 *depends solely on the tip-speed ratio.*

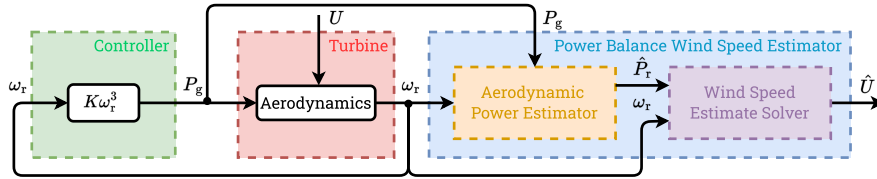

**Figure 2.** The general scheme of the power balance wind speed estimation considered in this study. The wind turbine (red block) is operated in a closed loop with a  $K\omega_r^3$  controller (green block), whereas the power balance wind speed estimator (blue block) is in an open-loop configuration with the turbine. The power balance wind speed estimator is subdivided into the aerodynamic power estimator (yellow block) and wind speed estimate solver (purple block).

**Assumption 2.** *The power coefficient represents the exact steady-state aerodynamic characteristics of the actual rotor.*

**Assumption 3.** *In the low-fidelity simulations provided throughout this study, the power coefficient of all the considered reference wind turbines (see Table 1) is equal to that of the NREL-5MW reference wind turbine so as to enable a clear analysis and comparison of the results between the various considered turbines.*

130 **Assumption 4.** *The drivetrain inertia value at the low-speed shaft side is assumed to be an a priori known parameter.*

### 3 Closed-Loop Wind Turbine Model and Rotor-Effective Wind Speed Estimation Framework

Figure 2 presents the overall scheme considered in this work, in which the wind turbine is controlled by a partial-load controller along with a power balance wind speed estimator. The wind speed estimator, being the main focus of the analysis in this work, is connected in an open loop to the closed-loop system. The red block represents the wind turbine, the green block contains the controller, and the blue block is the power balance wind speed estimator considered in this study.

Sections 3.1 and 3.2 provide the required theory used in this paper by outlining the first two subsystems, followed by defining the wind speed estimator. Then Section 3.3 addresses the decomposition of the estimator into several subcomponents, providing a framework for the remainder of the work presented in this paper.

#### 3.1 Single-Degree-of-Freedom Wind Turbine Model and Optimal Controller

140 In this work, single-degree-of-freedom power-balance drivetrain dynamics are considered as a simplified representation of a wind turbine as follows

$$J\omega_r(t)\dot{\omega}_r(t) = P_r(t) - P_g(t)/\eta_g, \quad (2)$$

where  $J \in \mathbb{R}$  is the low-speed shaft (LSS) equivalent inertia,  $\omega_r \in \mathbb{R}$  the rotor angular speed, and  $P_g \in \mathbb{R}$  the generated power with the corresponding generator efficiency factor  $\eta_g \in (0,1]$ . The aerodynamic power is given by the nonlinear relation

$$145 \quad P_r(t) = \frac{1}{2} \rho A_r C_p(\lambda(t)) U(t)^3, \quad (3)$$

in which  $\rho \in \mathbb{R}$ , denotes the air density,  $A_r \in \mathbb{R}$  the rotor area, and  $U \in \mathbb{R}$  the REWS (Soltani et al., 2013). The power coefficient at the fine pitch  $C_p : \mathbb{R} \rightarrow \mathbb{R}$  (see Assumption 1) is a nonlinear mapping from the non-dimensional tip-speed ratio (TSR), defined as

$$\lambda(t) = \frac{\omega_r(t)R}{U(t)}, \quad (4)$$

150 with  $R \in \mathbb{R}$  as the rotor radius.

**Remark 1.** The power coefficient considered in this work does not take into account the aerodynamic effects due to structural deformations, e.g., those associated with bend-twist coupling of the blades. Had this been the case, changes in local blade sections' angle of attack are expected and different combinations of  $\omega_r$  and  $U$ , although they correspond to the same  $\lambda$ , might yield different power coefficients. This would render the one-on-one mapping between  $\lambda$  and  $C_p$  inadequate such that  $C_p : \mathbb{R}^2 \rightarrow \mathbb{R}$  mapping is needed (i.e.,  $C_p(\omega_r, U)$  instead of  $C_p(\lambda)$ ; see Lazzerini et al. (2024) and references therein). Nevertheless, without loss of generality, the mapping of the former is adopted for the sake of clarity of the analysis of this paper; thus, the  $C_p$  tables in this work are generated using rigid rotor assumption.

The drivetrain system outputs  $\omega_r$ , which is then fed into the optimal torque controller (Bossanyi, 2000), often known as the ' $K\omega_r^2$ ' controller. However, partial-load controller design is not the main focus of this study; hence, the  $K\omega_r^2$  controller is deemed sufficient for the goal of this work. That said, this work is equally applicable to more advanced partial-load controllers available in the literature, such as tip-speed ratio tracking schemes, e.g., Brandetti et al. (2023) and Lazzerini et al. (2024). Note must be taken, however, that in the latter scheme, blade pitching is active in partial load. Thus, further study of the current scheme under varying pitch angles is required and reserved for future work. The  $K\omega_r^2$  controller, in its generator-power equivalence, is expressed as

$$165 \quad P_g(t) = \eta_g K \omega_r^3, \quad (5)$$

where

$$K = \frac{\pi \rho R^5 C_p^*}{2 \lambda^{*3}},$$

is the optimal control gain. The notation  $\lambda^*$  indicates the design TSR, corresponding to the optimal power coefficient, defined as  $C_p^* := C_p(\lambda^*)$ . Based on the expression (5), in the remainder of this paper, as well as in Fig. 2, this optimal controller is referred to as the ' $K\omega_r^3$ '.

### 3.2 Power Balance Wind Speed Estimation General Concept

This section establishes the REWS estimation framework that forms a basis for the remainder of this paper. The rationale behind the power balance REWS estimator presented herein lies in the retrievability of the wind speed information by asymptotic minimization of an error term between the aerodynamic power and its estimate, in which Assumption 2 holds, that is

$$175 \quad U(t) = \lim_{t \rightarrow \infty} \arg \min_{\hat{U}(t)} |e_p(t)|, \quad (6)$$

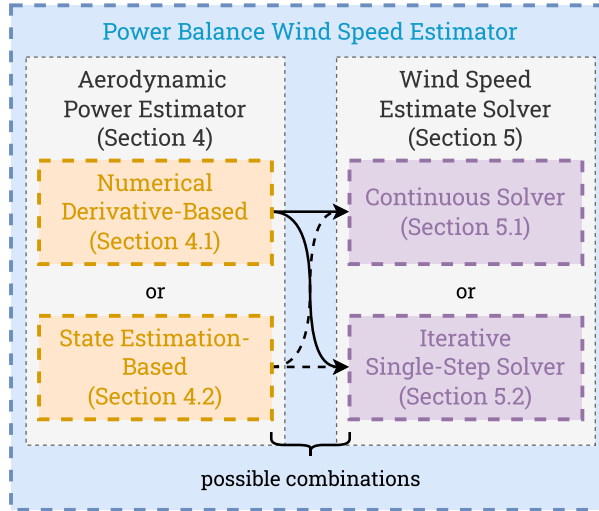

**Figure 3.** Power balance wind speed estimation partitioning. The left column contains the potential aerodynamic power estimators to be connected with the potential wind speed estimate solvers within the right column, thereby creating four possibilities for combining the two subcomponents.

where  $\hat{U} \in \mathbb{R}$  denotes the REWS estimate. The notation  $e_p \in \mathbb{R}$  is the said estimation error, defined as

$$e_p(t) = P_r(t) - \frac{1}{2} \rho A_r C_p \left( \hat{\lambda}(t) \right) \hat{U}(t)^3, \quad (7)$$

where the second term on the right-hand side of the equation is the aerodynamic power estimate based on (3), utilizing  $\hat{U}$  in place of  $U$ . The challenge of obtaining an estimate of  $P_r$  and solving the optimization problem of (6) is explained in further detail in the next section.

**Remark 2.** Note that (6) will not be achieved in the presence of discrepancies between the used and actual  $C_p$  tables. Such disparities will lead to a biased wind speed estimate as reported in Brandetti et al. (2022). Readers interested in the details of such ill-conditioning are thus referred to the study.

### 3.3 Wind Speed Estimator Subcomponent Partitioning

Now that the closed-loop controlled wind turbine and wind speed estimation problem has been defined, the power balance REWS estimator explained in Section 3.2 can be partitioned into two subcomponents to allow for both rigorous analysis and effective estimation schemes: (i) aerodynamic power estimator and (ii) wind speed estimate solver. Figures 2 and 3 depict this partitioning, the latter of which details the possible techniques to realize these two subcomponents. Similar separation approaches have also been adopted in the literature, e.g., in Van Engelen and Van der Hooft (2003) and Østergaard et al. (2007). The current study provides a more in-depth analysis of the subcomponents.

The first block provides an estimate of the aerodynamic power, which—in contrast to the measured generator power—is more challenging to obtain, as will be explained shortly. Fortunately, such information can still be obtained based on the available measurements and is the concern of the orange blocks in Figs. 2-3. By rearranging (2) and replacing specific variables with their estimated representations, one obtains

$$195 \quad \hat{P}_r(t) = J\omega_r(t)\hat{\omega}_r(t) + P_g(t)/\eta_g. \quad (8)$$

Note that  $\hat{P}_r$  and  $P_g/P_g/\eta_g$  are equal to each other in steady state; however, due to the variable nature of the wind and rotor speed, omitting the rotor acceleration term entirely from this calculation means losing valuable dynamic information (Østergaard et al., 2007; Soltani et al., 2013). Therefore, taking into account the dynamics by the utilization of the rotor acceleration and the  $J\omega_r\hat{\omega}_r$  terms enhances the accuracy of REWS estimate during both steady-state and transient conditions.

200 In practice, however, the rotor acceleration is not directly measurable, not to mention that it is challenging to obtain a good estimate of this quantity,  $\hat{\omega}_r$ , due to the noisy nature of measured signals in practice. To retrieve  $\hat{\omega}_r$ , one may resort to *numerical derivative* of  $\omega_r$  or *state estimation* methods as depicted in Fig. 3. Subsequently, the aerodynamic power estimate  $\hat{P}_r$  is obtained by solving (8).

**Remark 3.** *At this point, two aerodynamic power estimate terms have been introduced. One being  $\hat{P}_r$ , defined in (8) and*  
 205 *another being the second term on the right-hand side of (7). To prevent any confusion, the term ‘aerodynamic power estimate’ is used to refer to the former, whereas that of the latter from hereon is referred to as the ‘ $\hat{U}$ -dependent aerodynamic power estimate.’*

Independent of how  $\hat{P}_r$  is retrieved, such information, together with  $\omega_r$  measurements, is then fed into the wind speed estimate solver subcomponent indicated as the purple blocks in Fig. 3. Solving for the estimated wind speed is achieved in  
 210 two ways in this work: *continuous* (e.g., as used in Ortega et al. (2013) and Liu et al. (2022)) or *iterative single-step* manner (e.g., by Newton-Raphson methods as done in Van Engelen and Van der Hooft (2003) and Boukhezzar and Siguerdidjane (2011)). A linear analysis of the continuous wind speed estimate solver in continuous time will be provided, in which the stability properties of the linearized solver dynamics are derived. Furthermore, the effects of various discretization methods on the system, especially on the mentioned stability properties, are evaluated. The single-step approach solves the wind speed  
 215 estimate in a similar way to the former without the need for high solver gains, potentially causing stability issues to obtain good estimation quality without phase lags. Its wind speed estimation quality is determined by the choice of error tolerance parameters and iteration budget.

The aforementioned options for each of the subcomponents, therefore, allow for several possible combinations in which the power balance wind speed estimator can be constructed, as illustrated in Fig. 3; however, the optimal combination is yet to be  
 220 found. To that end, in the respective Sections 4 and 5, the derivations of the two aerodynamic power estimators and the wind speed estimate solvers are provided, where also their performance is evaluated.

## 4 Aerodynamic Power Estimator

As discussed previously, reconstructing aerodynamic power from available measurements is an essential step in obtaining an accurate REWS estimate in both steady-state and dynamic transient conditions. To this end, the most challenging part is obtaining an accurate estimate of the rotor acceleration  $\hat{\omega}_r$ , which is the main concern of this section. Two approaches are considered herein; first, the numerical derivative-based method is examined in Section 4.1. Later in Section 4.2, the state estimation-based technique is discussed. In Section 4.3, the numerical comparisons for both methods are evaluated.

### 4.1 Numerical Derivative-Based Technique

To obtain an estimate of the rotor acceleration, a numerical derivative is applied to the measured  $\omega_r$ . In the frequency domain, this is represented as follows

$$\hat{\Omega}_r(s) = F_{\text{nd,c}}(s, \tau) \Omega_r(s), \quad (9)$$

in which  $\Omega_r$  and  $\hat{\Omega}_r$ , with a slight abuse of notation for the latter, are the respective Laplace-transformed variables of  $\omega_r$  and  $\hat{\omega}_r$ . The transfer function

$$F_{\text{nd,c}}(s, \tau) = \frac{s}{\tau s + 1}, \quad (10)$$

in (9) is the filtered derivative<sup>2</sup> in accordance with IEEE 421.5-2016 standard (IEEE, 2016), with a unity derivative gain. The parameter  $\tau \in \mathbb{R}^{\geq 0}$  is the time constant of the numerical derivative.

In its implementation, the numerical derivative (10) is discretized via the Backward Difference method. Thus, the discrete-time transfer function of the filter is

$$F_{\text{nd,d}}(z, \tau) = \left( \frac{1}{\tau} \right) \frac{1 - z^{-1}}{1 + h/\tau - z^{-1}}, \quad (11)$$

where  $h$  denotes the sampling time.

As  $\tau$  is the only tuning parameter for the filter (11) it plays a crucial role. For instance, setting  $\tau = 0$  casts  $F_{\text{nd,d}}$  into a pure differentiator. This enables infinite amplification at the ~~high-frequencies~~ high frequencies (including noise), ~~that which~~ is propagated to  $\hat{\omega}_r$ , which is undesired. Having too large  $\tau$  is also unwanted as  $\hat{\omega}_r$  and the subsequent  $\hat{P}_r$  may become less accurate despite the better noise resilience. Calibration of  $\tau$  is, therefore, a trade-off between having an accurate rotor acceleration estimate and good noise suppression. In the following section, a numerical demonstration of such a trade-off is performed and analyzed.

#### 4.1.1 Time Constant Selection: Accuracy and Noise Propagation

As stated above, the choice of  $\tau$  may be helpful in suppressing the effects of noisy measurements often encountered in real-world scenarios. To provide a clearer picture on this aspect,  $F_{\text{nd,d}}$  is applied to the discrete-time rendition of (9), resulting in

<sup>2</sup>That is, a pure differentiator combined with a first-order low-pass filter.

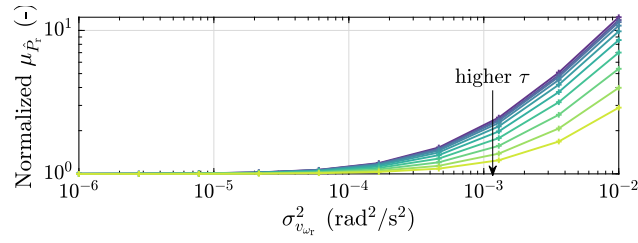

**Figure 4.** The mean of the aerodynamic power estimate  $\mu_{\hat{P}_r}$ , normalized with respect to that of a noiseless case. It is shown that with a high noise variance  $\sigma_{v_{\omega_r}}^2$  the noise propagated by the numerical derivative from  $\omega_r$  into  $\hat{\omega}_r$  results in a high bias in  $\hat{P}_r$ . Nonetheless, the application of  $\tau$  lessened the severity of the increased aerodynamic power estimation bias, shown by lower  $\mu_{\hat{P}_r}$  as  $\tau$  becomes higher.

250 the filtered and differentiated rotor speed

$$\tilde{\omega}_r(k) = \frac{\tilde{\omega}_r(k) - \tilde{\omega}_r(k-1) + \tau \tilde{\dot{\omega}}_r(k-1)}{\tau + h}, \quad (12)$$

with

$$\tilde{\omega}_r(k) = \omega_r(k) + v_{\omega_r}(k). \quad (13)$$

as the noisy rotor speed signal, where  $v_{\omega_r} \sim (0, \sigma_{v_{\omega_r}}^2)$  is an additive, Gaussian white noise with zero mean and variance  $\sigma_{v_{\omega_r}}^2$ .

255 The impact of the noise propagated from  $\tilde{\omega}_r$  will affect the aerodynamic power estimate, as made evident in the following relation, obtained by substituting (12)-(13) into (8)

$$\hat{P}_r(k) = J\tilde{\omega}_r(k)\tilde{\dot{\omega}}_r(k) + P_g(k)/\eta_g. \quad (14)$$

Note that the equation contains a multiplication between  $\tilde{\omega}_r$  and  $\tilde{\dot{\omega}}_r$ . This implies that the noise the former contains is multiplied with the one it propagated to the latter from the previous time step. This introduces a biased  $\hat{P}_r$  that varies on the noise variance because the product of a noise sequence with itself, although it is of zero mean, will give a nonzero mean<sup>3</sup>. A chosen  $\tau$  may lessen the effects of such noise propagation but may deteriorate  $\hat{P}_r$  estimation performance and is a trade-off.

To numerically demonstrate the effect of noisy measurements to (14), 400-second simulations, sampled at  $h = 0.02$  s, were run for time constants and noise variances of  $\tau \in [0, 10^{-1}]$  s and  $\sigma_{v_{\omega_r}}^2 \in [10^{-6}, 10^{-2}]$  rad<sup>2</sup>/s<sup>2</sup>, respectively. In addition, the [inertia value of the NREL-5MW 's inertia value](#) is used (see Table 1), under the steady-state operating conditions  $\tilde{\omega}_r = 0.8$  rad/s and  $\tilde{P}_g = 1.647$   ~~$\tilde{P}_g = 1.548$~~  MW, the latter of which is computed using (5) with  $C_p^* = 0.469$  and  $\lambda^* = 6.53$  and  $\eta_g = 0.94$ . Figure 4 summarizes the statistical results of these simulations, where  $\mu_{\hat{P}_r}$  is the mean of the aerodynamic power estimate.

It is apparent in the figure that greater noise variance leads to higher  $\mu_{\hat{P}_r}$ , representing added bias in the aerodynamic power estimate; nevertheless, employing high  $\tau$  values alleviates such deterioration to some extent. Also implied in this observation

<sup>3</sup>Consider this product to be  $\nu_{\omega_r} = v_{\omega_r}^\top v_{\omega_r}$ . The mean of  $\nu_{\omega_r}$  is thus equal to the variance of  $v_{\omega_r}$ , namely  $E[\nu_{\omega_r}] = E[v_{\omega_r}^\top v_{\omega_r}] = \sigma_{v_{\omega_r}}^2$ , where  $E$  is the expected value operator (Verhaegen and Verdult, 2007).



270 is using  $\tau = 0$  s (i.e., using a pure differentiator) is not desirable, especially in highly noisy environments, as this would lead to an infinite amplification of high-frequency components. In conclusion, attention needs to be paid to noisy  $\omega_r$  conditions as the resulting biased  $\hat{P}_r$  may undermine the REWS estimation in the end.

## 4.2 State Estimation-Based Technique

Besides the aforementioned numerical derivative technique to obtain  $\hat{\omega}_r$  and, thus,  $\hat{P}_r$ , state estimation-based methods can also  
 275 be employed. Obtaining  $\hat{P}_r$  via state estimation can be proven to be more beneficial compared to the numerical derivative technique in the possessed freedom to trade-off sensitivity to noisy measurements with responsiveness by estimation gain tuning, however, might be more challenging in its implementation and calibration.

Despite the adopted power balance wind speed estimation framework, the state estimator employed in this section utilizes an internal model based on the torque balance variant of (2). Retaining the power variables in (2) would lead to the internal  
 280 estimator dynamics being nonlinear such that it becomes necessary to obtain the ~~system's Jacobians~~ adding Jacobians of the system—adding complexities to the observer design. Therefore, to provide an aerodynamic power estimate, a reformulation is performed to obtain a torque-based estimator. To this end, the internal model is described as the following dynamics

$$\dot{\omega}_r(t) = \frac{T_r(t) - GT_g(t)}{J}, \quad (15)$$

where  $G \in \mathbb{R}^+$  is the gearbox ratio of the drivetrain,  $T_r = P_r/\omega_r$  is the aerodynamic torque, and  ~~$T_g = P_g/(\omega_r G)$~~   $T_g = P_g/(\eta_g \omega_r G)$   
 285 is the generator torque.

The dynamics (15) are then recast into the following discrete state-space form by employing Forward Euler discretization

$$\begin{aligned} x_s(k+1) &= A_s x_s(k) + B_{s,u} u_s(k) + B_{s,d} d_s(k) + w_{\omega_r}(k), \\ y_s(k) &= C_s x_s(k) + v_{\omega_r}(k), \end{aligned} \quad (16)$$

with

$$290 \quad x_s = \omega_r, \quad u_s = T_g, \quad d_s = T_r, \quad \text{and} \quad y_s = \omega_r,$$

as the respective ~~estimator's~~ state, input, disturbance, and output, and the state space matrices

$$A_s = 1, \quad B_{s,u} = -hJ^{-1}G, \quad B_{s,d} = hJ^{-1}, \quad \text{and} \quad C_s = 1,$$

where  $\{x_s, u_s, d_s, y_s\} \in \mathbb{R}$  and  $\{A_s, B_{s,u}, B_{s,d}, C_s\} \in \mathbb{R}$ . Also included in (16) are the process noise  $w_{\omega_r} \sim (0, \sigma_{w_{\omega_r}}^2)$  with variance  $\sigma_{w_{\omega_r}}^2$  and measurement noise  $v_{\omega_r} \sim (0, \sigma_{v_{\omega_r}}^2)$  with variance  $\sigma_{v_{\omega_r}}^2$ , both assumed to be uncorrelated, zero-mean, Gaussian  
 295 white noise. The aerodynamic torque is considered to be an unknown input and, therefore, a subject of the estimation. Thus, it is recast as a *random-walk* process (Verhaegen and Verdult, 2007) as follows

$$T_r(k+1) = T_r(k) + w_{T_r}(k), \quad (17)$$

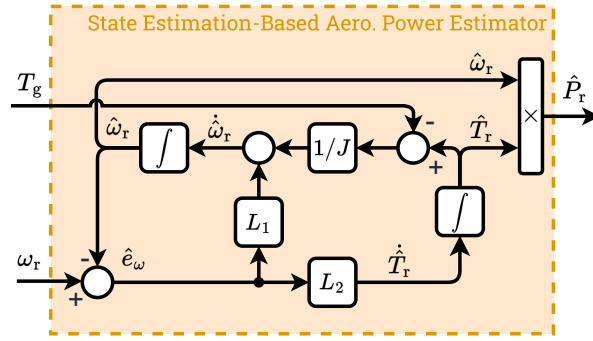

**Figure 5.** Internal structure of the state estimation-based aerodynamic power estimator. Note that the aerodynamic power estimate  $\hat{P}_r$  is the product of the rotor speed estimate  $\hat{\omega}_r$  and aerodynamic torque estimate  $\hat{T}_r$ . See Remark 4 for more details.

where  $w_{T_r} \sim (0, \sigma_{w_{T_r}}^2)$  is a zero-mean Gaussian white noise sequence with variance  $\sigma_{w_{T_r}}^2$ , uncorrelated to  $w_{\omega_r}$  and  $v_{\omega_r}$ . One advantage of treating  $T_r$  as a random-walk process is in the ease of design as no a priori information, such as aerodynamic torque coefficient, is needed. In particular, the Jacobian of this term is not necessary given that it is a nonlinear function of  $v$  and  $\omega_r$ .

The general state space expression for the state estimator—as depicted in Fig. 5, augmenting (17) to (16) and also including feedback from the measured system output  $y = \omega_r$ , is written as follows

$$\begin{aligned}
 \underbrace{\begin{bmatrix} \hat{x}_s(k+1) \\ \hat{T}_r(k+1) \end{bmatrix}}_{\hat{\mathbf{x}}_{s,\text{aug}}(k+1)} &= \underbrace{\begin{bmatrix} A_s & B_{s,d} \\ 0 & 1 \end{bmatrix}}_{\mathbf{A}_{s,\text{aug}}} \underbrace{\begin{bmatrix} \hat{x}_s(k) \\ \hat{T}_r(k) \end{bmatrix}}_{\hat{\mathbf{x}}_{s,\text{aug}}(k)} + \underbrace{\begin{bmatrix} B_{s,u} \\ 0 \end{bmatrix}}_{\mathbf{B}_{s,\text{aug}}} T_g(k) \\
 &+ \underbrace{\begin{bmatrix} w_{\omega_r}(k) \\ w_{T_r}(k) \end{bmatrix}}_{\mathbf{w}_{s,\text{aug}}(k)} + \mathbf{L}(y(k) - \hat{y}_s(k)), \\
 \hat{y}_s(k) &= \underbrace{\begin{bmatrix} C_s & 0 \end{bmatrix}}_{\mathbf{C}_{s,\text{aug}}} \underbrace{\begin{bmatrix} \hat{x}_s(k) \\ \hat{T}_r(k) \end{bmatrix}}_{\hat{\mathbf{x}}_{s,\text{aug}}(k)} + v_{\omega_r}(k),
 \end{aligned} \tag{18}$$

with  $\mathbf{L} = [L_1, L_2]^T$  as the observer gain vector. This gain can be determined either by a pole placement (Luenberger approach) or Kalman design, the latter of which is able to provide minimum-variance, unbiased state estimation by solving an algebraic Riccati equation involving the noise covariance matrices. However, because the former provides more freedom to define the state estimator's pole locations—pole locations of the state estimator according to one's own optimal performance criterion, in this study,  $\mathbf{L}$  is determined by pole placement.

310 **Remark 4.** Similar to the numerical derivative-based method, the state estimation scheme above can provide the aerodynamic power estimate by making use of the relation  $\hat{P}_r = J\hat{\omega}_r\hat{\omega}_r + P_g\hat{P}_r = J\hat{\omega}_r\hat{\omega}_r + P_g/\eta_g$ . Nevertheless, as in the state estimation-based scheme considered in this section, the quantities  $\hat{\omega}_r$  and  $\hat{T}_r$  are accessible directly from the augmented state vector  $\hat{x}_{s,\text{aug}}$  such that the aerodynamic power estimate can be computed straightforwardly via  $\hat{P}_r = \hat{\omega}_r\hat{T}_r$ . Thus, this approach is considered for the remainder of this study.

315 In the aforementioned Luenberger approach,  $L$  needs to be designed such that  $\mathbf{A}_{s,\text{aug}} - \mathbf{L}\mathbf{C}_{s,\text{aug}}$  has stable eigenvalues. Such a condition guarantees the convergence of  $y - \hat{y}_s$  ~~'s convergence~~ to zero given observable  $(\mathbf{A}_{s,\text{aug}}, \mathbf{C}_{s,\text{aug}})$ . Evaluating this condition confirms that it is satisfied for  $hJ^{-1} \neq 0$ , which is always the case in practical scenarios.

With regard to the estimator's performance, having a closer look into the characteristic polynomial of  $\mathbf{A}_{s,\text{aug}} - \mathbf{L}\mathbf{C}_{s,\text{aug}}$  may shed some new insights, e.g., how the design can be applied for different wind turbine power ratings. Furthermore, it is also somewhat known that the power rating of a wind turbine ~~'s power rating~~ is associated with its dimension and, thus, inertial properties (Rodriguez et al., 2007), which, in this particular case, is the most influential as  $h, G \ll J$ . This indicates that a selected  $L$  suitable for a wind turbine might give a different performance when applied to another turbine with a different power rating. Therefore, it is crucial to find a gain-tailoring guideline in such a way that identical state estimator performance among different power ratings or inertia values can be found.

325 The aforementioned considerations are addressed in the following sections: Section 4.2.1 provides the investigation into the characteristic polynomial of the estimator. A numerical demonstration is presented in Section 4.2.2 to compare the performance of the estimator with and without such a guideline.

#### 4.2.1 State Estimator Characteristic Polynomial

This section covers the analysis of the characteristic polynomial for the state estimation-based aerodynamic power estimator laid out in the previous section. Investigation into such a characteristic polynomial informs one about how, for instance, a choice of estimator gain influences the ~~estimator's~~ natural frequency and damping of the estimator. The characteristic polynomial is derived as follows

$$\det(zI - \mathbf{A}_{s,\text{aug}} + \mathbf{L}\mathbf{C}_{s,\text{aug}}) = z^2 + p_1z + p_2 = 0, \quad (19)$$

in which the roots of the polynomial coefficients are parameterized as

$$335 \quad p_1 = 2(h\omega_0\zeta_0 - 1) = L_1 - 2, \quad (20a)$$

$$p_2 = 1 - 2h\zeta_0\omega_0 + h^2\omega_0^2 = 1 - L_1 + \frac{h}{J}L_2, \quad (20b)$$

where  $\omega_0$  and  $\zeta_0$  are the respective natural frequency and damping ratio of the continuous-time characteristic equation<sup>4</sup>, which by further manipulation of (20) leads to

$$\omega_0 = \sqrt{\frac{L_2}{hJ}}, \quad (21a)$$

$$340 \quad \zeta_0 = \frac{L_1}{2h\omega_0}. \quad (21b)$$

It is directly evident from the above equations that to maintain constant  $\omega_0$  and  $\zeta_0$  for a range of different turbines, the ratio  $L_2/J$  needs to be maintained constant under the assumption that  $L_1$  and  $h$  are equal for all turbines. Furthermore, it is more insightful to express  $L_1$  and  $L_2$  in terms of  $\omega_0$  and  $\zeta_0$  by rearranging (21) as follows

$$L_1 = 2h\zeta_0\omega_0, \quad (22a)$$

$$345 \quad L_2 = hJ\omega_0^2. \quad (22b)$$

The relation above allows one to determine both gains based on specified  $\omega_0$  and  $\zeta_0$ , but most importantly, it becomes clear that  $L_2$  needs to be tailored based on the turbine inertia, especially if one desires to apply the estimator for different turbine sizes and power ratings as discussed in the previous section. In the following section, how this gain is tailored for a range of wind turbine inertias is discussed, and a numerical demonstration is also provided.

#### 350 4.2.2 Constant and Tailored Estimator Gain Comparison

To numerically demonstrate the performance difference between constant and tailored  $L_2$  over the considered range of turbines, 800-second simulations (sampled at  $h = 0.02$  s) are performed with a turbulent wind with mean speed  $U_h = 7.5$  m/s and intensity  $I_T = 4\%$ . The drivetrain dynamics (2) in closed-loop with the controller (5) are incorporated to represent the wind turbine. Ten wind turbines within  $P_{g,\text{rated}} \in [5, 25]$  MW range are considered and the inverse of (1b) is made use of to obtain  
 355  $R = D/2$  from the specified  $P_{g,\text{rated}}$ , e.g., to compute TSR and the optimal mode gain  $K$ .

Their estimator gains are subsequently obtained using (22), in which  $\omega_0 = 25$  rad/s and  $\zeta_0 = 1$  are chosen and, as will be shown later, result in satisfactory estimator performance. The  $J$  values derived from (1c) for the selected  $P_{g,\text{rated}}$  range and are subsequently substituted to (22b) to adjust  $L_2$ <sup>5</sup>. For the constant gain case, the  $L_2$  computed for  $P_{g,\text{rated}} = 5$  MW is considered for all turbines. No noise is assumed for  $\omega_r$  measurements for ~~simplicity's sake~~ the sake of simplicity in this demonstration;  
 360 nevertheless, similar conclusions can be derived under noisy measurements.

Figure 6 summarizes the key statistical results of the simulations, being the absolute means ( $|\mu_{(\bullet)}|$ ) and standard deviations ( $\sigma_{(\bullet)}$ ) of the rotor speed, aerodynamic torque, and aerodynamic power estimation errors,  $\omega_r - \hat{\omega}_r$  and  $T_r - \hat{T}_r$ , and  $P_r - \hat{P}_r$  respectively. In general, it is observed from the figure that, compared with the tailored gain case, the use of constant gain deteriorates the absolute means and standard deviations as the power rating increases. However, an exception applies for  
 365  $\sigma_{T_r - \hat{T}_r}$  and  $\sigma_{P_r - \hat{P}_r}$  where similar results are depicted for both cases.

<sup>4</sup>That is,  $s^2 + 2\zeta_0\omega_0s + \omega_0^2 = 0$ . Applying Forward Euler discretization to this equation gives (19).

<sup>5</sup>Alternatively, one may also use the previously obtained  $D$  followed by a substitution to (1a).

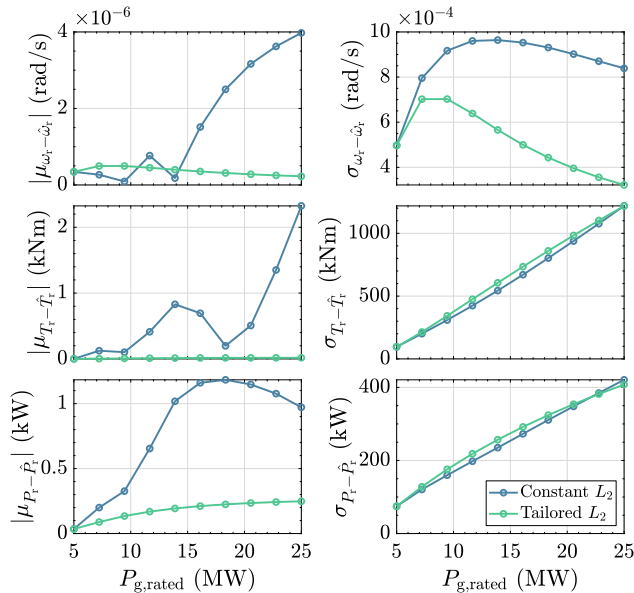

**Figure 6.** Statistical assessment results of the constant (blue) and tailored (green) Luenberger estimator’s  $L_2$  gain based on the **turbine’s** power rating (and inertia) of the turbines. Absolute errors of the rotor speed, aerodynamic torque, and aerodynamic power estimates (left column) of the constant  $L_2$  strategy tend to be much higher than the tailored gain. Significant difference in the standard deviation of these errors (right column) is only shown for the the rotor speed estimation, whereas those of the aerodynamic torque and power are comparable. These results imply that appropriate gain adjustment based on the **turbine’s**-power rating of the corresponding turbine is imperative.

The observation from the above demonstration motivates the need to set a new standard, i.e., by employing  $L_2$  tailoring based on the power rating and consequent drivetrain inertia of the considered turbines, which provides a convenient means to calibrate state estimation-based aerodynamic power estimation. As will be shown later, such a gain-tailoring—and more importantly, the state estimation-based aerodynamic power estimator—leads to faster (less phase lag) and more noise-resilient  
370 wind speed estimation.

### 4.3 Aerodynamic Power Estimation Techniques Comparison

With the numerical derivative and state estimation approaches to estimate aerodynamic power already presented in the previous sections at hand, this section is now dedicated to comparing both methods. To this end, simulations with the same turbulent wind setting in Section 4.2.2 are run, where a wind turbine of  $P_{g,rated} = 15$  MW, representing a ‘mid-sized’ turbine in the  
375 considered turbine range, is utilized. In addition, noisy rotor speed measurements are assumed, with  $\sigma_{v_{\omega_r}}^2 = 10^{-6} \text{ rad}^2/\text{s}^2$ .

Two strategies in obtaining  $\hat{P}_r$  are compared:

1. Using filtered derivative  $F_{nd,d}$  introduced in Section 4.1 to obtain  $\hat{\omega}_r$ , followed by its substitution to (8), including  $\omega_r$  and  $P_g$  measurements with known  $J$  according to Assumption 4. A time constant of  $\tau = 0.5$  s is selected as it is considered a good trade-off between noise correlation, quality of the derivative, and noise amplification limitation;

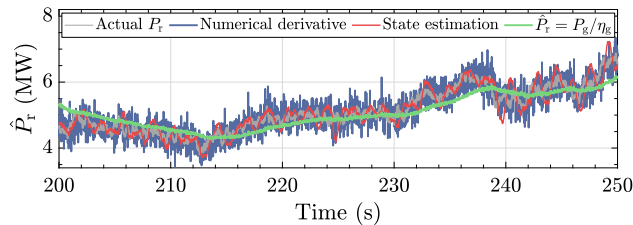

**Figure 7.** Comparison of aerodynamic power estimation methods. It is shown that the estimate obtained via the state estimation-based technique (red lines) has much less noise compared with that of the numerical derivative one (blue lines) while still maintaining high estimation accuracy. Also depicted is the aerodynamic power estimate determined only using the generated power (green lines), which shows the worst-case phase lag with respect to the other methods, demonstrating the loss of information if rotor acceleration information is absent.

380 2. Directly retrieving  $\hat{P}_r$  by state estimation method explained in Section 4.2 by multiplying  $\hat{\omega}_r$  and  $\hat{T}_r$  (see Remark 4). The gain  $\mathbf{L}$  is computed by setting  $\omega_0 = 25$  rad/s and  $\zeta_0 = 1$  as used in the previous section.

Figure 7 depicts the time series results of the simulation, where, for clarity, only chosen for the timestamp  $t = 200 - 250$  s. In the figure, the actual aerodynamic power as a ground truth is indicated by the gray line. It can be seen that the aerodynamic power estimation result for the state estimation-based method excels that of the numerical derivative one in terms of less noise  
385 propagation and phase lag.

Note that, for the latter, increasing  $\tau$  will result in less noise but increasing phase lag (Østergaard et al., 2007) as this will diminish and deteriorate the  $J\omega_r\hat{\omega}_r$  estimate such that  $\hat{P}_r \approx P_g - \hat{P}_r \approx P_g/\eta_g$  (i.e. information will be lost). The case where  $J\omega_r\hat{\omega}_r = 0$  such that  $\hat{P}_r = P_g - \hat{P}_r = P_g/\eta_g$  is demonstrated by the green line, which evidently shows a phase lag with respect to those where the information of  $J\omega_r\hat{\omega}_r$  is made available. It is concluded, therefore, that for the power balance REWS estimation  
390 scheme, the state estimation-based aerodynamic power estimator is to be used for the remainder of this paper. Note that the performance of the state estimation method can be improved by further tuning of  $\omega_0$  and  $\zeta_0$ .

## 5 Wind Speed Estimate Solver

Having a good estimate of the aerodynamic power is crucial for the second component of the overall power balance wind speed estimation scheme, which solves the effective wind speed estimate (see Fig. 2). Alluded to earlier in Section 3.3 and shown in  
395 Fig. 3, the two manners in which such a solver can be designed are detailed in the following sections. Section 5.1 discusses the continuous solver, where the linear state-space derivation of the solver is done, followed by frequency-domain analysis. Then, the stability of the solver in the discrete-time domain is discussed. Later, in Section 5.2, the iterative single-step algorithm is proposed as a promising alternative to the former.

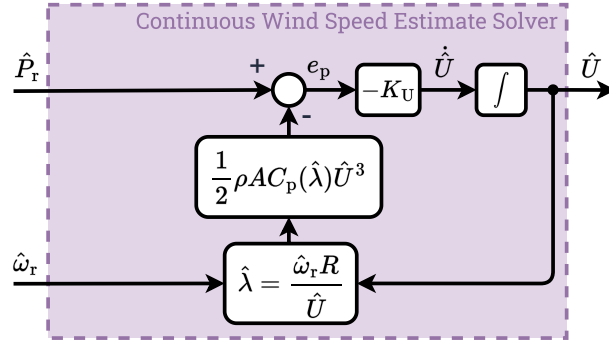

**Figure 8.** Internal structure of the continuous wind speed estimate solver.

## 5.1 Continuous Solver

400 This section presents an analysis of the continuous manner ~~to solve of solving~~ the wind speed estimate, given that the aerodynamic power estimate and rotor speed measurements are provided. Figure 8 depicts the internal structure of this continuous wind speed estimate solver and is elaborated in the following.

As laid out in Section 3.2, asymptotically minimizing the estimation error term  $e_p$  returns the wind speed estimate  $\hat{U}$ , which converges to the actual wind speed over time per the definition in (6). Such an integration operation enables the wind speed  
405 estimate solver to be written as the following state transition equation

$$\dot{\hat{U}}(t) = -K_U e_p(t), \quad (23)$$

with the integrator gain

$$K_U = \frac{\kappa}{P_{g,\text{rated}}}, \quad (24)$$

determining the convergence rate. The notation  $\kappa \in \mathbb{R}^+$  is a constant and the rated generator power  $P_{g,\text{rated}} \in \mathbb{R}^+$  is used to  
410 convert  $e_p$  from wattage into the per-unit (p.u.) system.

As  $e_p$  has a nonlinear analytic definition (7), the wind speed estimate solver in the continuous time is represented by the following nonlinear dynamics

with

$$415 \quad x = \hat{U}, \quad \mathbf{u} = \begin{bmatrix} \hat{P}_r \\ \hat{\omega}_r \end{bmatrix}^\top, \quad \text{and} \quad y = \hat{U},$$

as its state, input, and output vectors, respectively.

To proceed with the linear analysis, the first-order Taylor expansion of  $\mathcal{S}$  is derived, resulting in the following linear state-space system

$$\begin{aligned}\dot{x}(t) &= Ax(t) + \mathbf{B}u(t), \\ y(t) &= Cx(t),\end{aligned}\tag{25}$$

420 with the state, input, and output matrices defined by the following Jacobians

$$\begin{aligned}A &= \left. \frac{\partial f}{\partial x} \right|_{(\bar{x}, \bar{u}, \bar{y})} = -\frac{K_U}{2} \rho A_r \bar{U}^2 \left( 3C_p(\bar{\lambda}) - \bar{\lambda} \frac{\partial C_p}{\partial \bar{\lambda}} \right), \\ \mathbf{B} &= \left. \frac{\partial f}{\partial \mathbf{u}} \right|_{(\bar{x}, \bar{u}, \bar{y})} = -K_U \left[ 1 \quad -\frac{1}{2} \rho A_r R \bar{U}^2 \frac{\partial C_p}{\partial \bar{\lambda}} \right], \\ C &= \left. \frac{\partial g}{\partial x} \right|_{(\bar{x}, \bar{u}, \bar{y})} = 1,\end{aligned}\tag{26}$$

respectively.

Given the linearized dynamics above, it becomes compelling to examine the stability properties of the linear system. To this end, the next subsections provide frequency-domain stability and discretization-method analysis utilizing the above-derived  
425 linear system.

### 5.1.1 Frequency-Domain Stability Analysis

In the previous section, the nonlinear dynamics of the continuous solver have been described, followed by their linear state-space rendition. Here, the stability of the solver is assessed via pole location investigation. Solving for  $\mathbf{G}(s) = Y(s)/U(s) = C(s - A)^{-1}\mathbf{B}$ , one obtains the multiple-input single-output transfer matrix formulation of the state-space (25) as follows

$$430 \quad \mathbf{G}(s) = \frac{\mathbf{N}}{D(s)}.\tag{27}$$

The notations  $\mathbf{N} = \mathbf{B}$  and  $D(s)$  are the respective numerators and denominator of the transfer functions above, with the former being a constant gain vector, hence the independence from  $s$ . The latter is of interest, especially with regard to stability analysis.

The denominator of the transfer functions is

$$D(s) = s + \underbrace{\frac{K_U}{2} \rho A_r \bar{U}^2 \left( 3C_p(\bar{\lambda}) - \bar{\lambda} \frac{\partial C_p}{\partial \bar{\lambda}} \right)}_p,\tag{28}$$

435 which, in order to guarantee stability, left half-plane pole location  $p < 0$  must be satisfied such that

$$p = -\underbrace{\frac{K_U}{2} \rho A_r \bar{U}^2}_{p_c} \left( \underbrace{3C_p(\bar{\lambda})}_{p_a} - \underbrace{\bar{\lambda} \frac{\partial C_p}{\partial \bar{\lambda}}}_{p_b} \right) < 0,\tag{29}$$



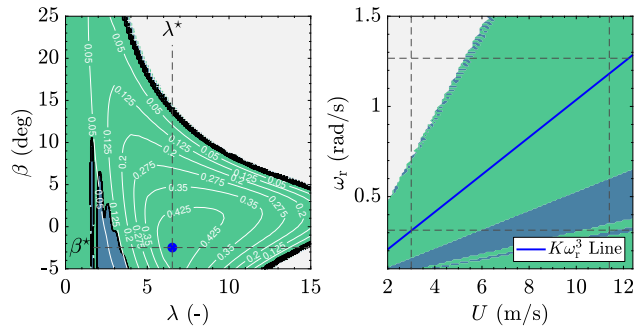

**Figure 9.** Stability region of the continuous wind speed estimate solver in the continuous time  $\mathbf{G}(s)$ , where the condition  $p < 0$  in (29) is satisfied (indicated in green, otherwise in blue). The left subfigure shows the different  $C_p$  levels for the NREL-5MW turbine (white solid lines), with  $C_p^*$  indicated by the blue dot. The right subfigure shows the mapping of the stability region in terms of wind speed  $U$  and rotor speed  $\omega_r$  for the fine pitch angle  $\beta^*$ . The solid blue line is the partial-load regime, where the  $K\omega_r^3$  controller is active. Also shown for completeness are the black dashed lines, indicating the lower and upper bounds for the rotor speed, as well as cut-in and rated wind speeds.

with  $p_c > 0$ . The inequality (29) requires  $p_a - p_b > 0$  to hold to ensure the pole stays within the left-half plane. This condition, which can be rewritten as

$$p_a > p_b \Leftrightarrow \frac{3}{\bar{\lambda}} C_p(\bar{\lambda}) > \frac{\partial C_p}{\partial \bar{\lambda}}, \quad (30)$$

440 is a well-known condition for global asymptotic stability in the (Improved) Immersion and Invariance wind speed estimator works, e.g., Ortega et al. (2013) and Liu et al. (2022).

With the stability expression of (29)/(30) at hand, a stability map at different operating conditions is made. For this purpose, the  $C_p$  table of the NREL-5MW is taken. Figure 9 depicts the resulting stability region of the continuous wind speed estimate solver. The stable region is shown in green, whereas the unstable region is in blue. The left subfigure illustrates how the  $C_p$  contour is divided based on whether (29)/(30) is satisfied. The blue dot shows the location of  $C_p^*$ , corresponding to the fine pitch  $\beta^*$  (horizontal dashed line) and design TSR  $\lambda^*$  (vertical dashed line). The operating conditions at the  $\beta^*$  line are mapped on the right subfigure, resulting in the stability region representation in terms of  $U$  and  $\omega_r$ . The blue solid line represents  $\lambda^*$  or  $K\omega_r^3$  line, where maximum power extraction occurs. As can be seen, the continuous wind speed estimate solver is stable for a large part of the turbine operational domain and, more importantly, along the optimal  $K\omega_r^3$  line where the turbine operates in partial-load in the steady state.

450 However, as far as practicality is concerned, the effects of discrete-time implementations should extend the above continuous-time analysis. A discretization method, for instance, might not preserve the stability properties obtained in the continuous-time domain (Åström and Wittenmark, 2011). Moreover, different estimator gain  $\kappa$  values influence the stability region. These aspects are the main concerns in the next section.

## 455 5.1.2 Solver Discretization and Instability

In this section, the stability of the continuous wind speed estimate solver (27) in the discrete time is discussed. The three most common discretization methods are considered as follows (Åström and Wittenmark, 2011)

1. The Forward Euler (FE) method, the  $s$ -to- $z$ -domain transformation of which is as follows

$$s'_{\text{FE}} = \frac{z-1}{h}. \quad (31)$$

- 460 2. The Backward Difference (BD) method, with the following transformation

$$s'_{\text{BD}} = \frac{z-1}{zh}. \quad (32)$$

3. The Tustin (TU) method, with

$$s'_{\text{TU}} = \frac{2}{h} \frac{z-1}{z+1}. \quad (33)$$

as the corresponding  $s$ -to- $z$ -domain transformation.

- 465 Substituting any of the above discretization methods into  $\mathbf{G}(s)$  results in the following general discrete-time approximation representation

$$\mathbf{G}(s = s') = \mathbf{H}(z) = \frac{\mathbf{P}(z)}{\mathbf{Q}(z)}, \quad (34)$$

with  $\mathbf{P}(z)$  denoting the numerators and  $\mathbf{Q}(z)$  the denominator of the discrete-time transfer function  $\mathbf{H}(z)$ .

- 470 Similar to its continuous-time counterpart, discrete-time stability analysis only focuses on the poles of the system, i.e. whether they are within the unit disc, such that in the following study, only  $\mathbf{Q}(z)$  is of interest (Åström and Wittenmark, 2011). Explicit representations for  $\mathbf{H}(z)$ , obtained by the discretization methods (31)-(33), are, therefore, provided below and their corresponding stability condition derivation follows

1. Using  $s = s'_{\text{FE}}$  for the FE method,  $\mathbf{G}(s)$  becomes

$$\mathbf{H}_{\text{FE}}(z) = \frac{\mathbf{N}h}{z + K_{\text{U,h}} \frac{1}{2} \rho A_r \tilde{U}^2 (p_a - p_b) - 1}, \quad (35)$$

- 475 with  $K_{\text{U,h}} = hK_{\text{U}}$  (or, similarly,  $K_{\text{U,h}} = h\kappa/P_{\text{g, rated}}$ ). From (35), the following inequality must hold for stability to hold

$$\left| 1 - K_{\text{U,h}} \frac{1}{2} \rho A_r \tilde{U}^2 (p_a - p_b) \right| < 1. \quad (36)$$

2. For the BD method,  $s = s'_{\text{BD}}$  is used and the following discrete transfer function is obtained

$$\mathbf{H}_{\text{BD}}(z) = \frac{(\mathbf{N}h)z}{\left(1 + K_{\text{U,h}} \frac{1}{2} \rho A_r \tilde{U}^2 (p_a - p_b)\right) z - 1}, \quad (37)$$

480 with the following condition for stability

$$\left| \frac{1}{1 + K_{U,h} \frac{1}{2} \rho A_r \bar{U}^2 (p_a - p_b)} \right| < 1. \quad (38)$$

3. Under the TU discretization,  $s = s'_{TU}$  casts  $\mathbf{G}(s)$  into

$$\mathbf{H}_{TU}(z) = \frac{\frac{Nh}{2}(z+1)}{z + K_{U,h} \frac{1}{4} \rho A_r \bar{U}^2 (p_a - p_b)(z+1) - 1}, \quad (39)$$

the stability of which is determined by the following inequality

$$485 \left| \frac{1 - K_{U,h} \frac{1}{4} \rho A_r \bar{U}^2 (p_a - p_b)}{1 + K_{U,h} \frac{1}{4} \rho A_r \bar{U}^2 (p_a - p_b)} \right| < 1. \quad (40)$$

Note that the stability properties may now be influenced by the choice of sampling time  $h$  and gain  $\kappa$  (as  $P_{g,\text{rated}}$  is constant). Nevertheless, to illustrate better whether alterations in the stability region occur after discretization takes place, the stability conditions (36), (38), and (40) are plotted in a similar manner as Fig. 9, as explained in the following text. Also considered are two arbitrary operating points (OPs) along the  $K\omega_r^3$  line for a low and high partial-load wind speed being

$$490 \text{ OP 1: } \begin{cases} \bar{x} = \bar{y} = \bar{U} = 4.5 \text{ m/s}, \\ \bar{\mathbf{u}} = [\bar{P}_r, \bar{\omega}_r]^\top = [3.263 \times 10^5 \text{ W}, 0.469 \text{ rad/s}]^\top, \end{cases}$$

and

$$\text{OP 2: } \begin{cases} \bar{x} = \bar{y} = \bar{U} = 10.5 \text{ m/s}, \\ \bar{\mathbf{u}} = [\bar{P}_r, \bar{\omega}_r]^\top = [4.145 \times 10^6 \text{ W}, 1.094 \text{ rad/s}]^\top, \end{cases}$$

respectively, computed using the NREL-5MW properties.

First, the stability region for the FE method, with  $h = 1/50$  s—constant for all evaluations, is examined. Figure 10 depicts  
 495 the resulting stability assessment, which illustrates the deterioration of the ~~FE method's stability region~~ stability region of the FE method as  $\kappa$  increases, affecting the partial-load operations (blue solid line), e.g. OP 2 (red dot). Although not shown in the figure, even higher  $\kappa$  may affect low-wind speed operations. This observation, therefore, concludes that one's choice of discretization method results in a performance limitation of the wind speed estimate solver in terms of an existing 'upper bound' for the magnitude of  $\kappa$ 's magnitude. A compromise can be made, nevertheless, to improve the ~~FE method's stability~~ stability of the FE method  
 500 of the FE method by increasing sampling frequency (i.e., lowering  $h$ ) proportional to the increase in  $\kappa$  to maintain constant  $K_{U,h}$ . That said, increasing the sampling frequency does not eliminate the presence of a  $\kappa$  'upper bound,' not to mention the extent to which such a frequency can be increased is practically limited as a result, e.g., hardware capabilities. Therefore, a more feasible solution is to adopt different discretization methods while leaving the sampling frequency unchanged.

Figure 11 makes clear that the BD method, in contrast to the FE method, does not result in the change of stability charac-  
 505 teristics of the continuous system into the discrete system for the considered  $\kappa$  values. Remarkably, if  $\kappa$  is further increased,

Forward Euler Discretization - Stability Evaluation

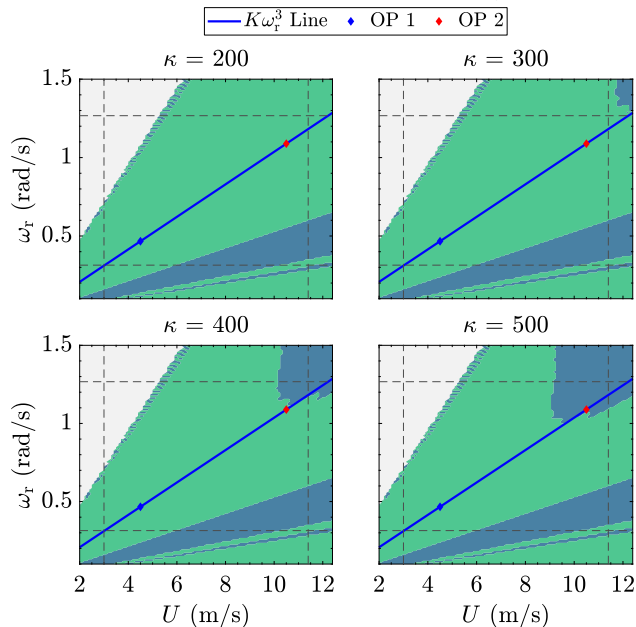

**Figure 10.** Unstable region (blue area) growth of  $\mathbf{H}_{FE}(z)$  with increasing  $\kappa = \{200, 300, 400, 500\}$  using  $h = 1/50$  s of sampling time and the Forward Euler discretization method.

the pole of the discrete-time system  $\mathbf{H}_{BD}(z)$  moves away even more from the edge of the unit circle (as implied in (38), theoretically leading to increased stability for increasing gains).

Similar to the BD method, the TU method gain increase will lead the discrete-time pole to move closer to the origin, but under the same gain, that of the TU method will be closer to the origin than the BD method. This is because with the TU method, higher gains simultaneously lower the numerator and increase the denominator of the discrete pole, as can be implied from (40). Regardless, for the considered  $\kappa$ , the stability region of the TU-discretized system  $\mathbf{H}_{TU}(z)$  is identical to that of  $\mathbf{G}(s)$ . It is worth noting, therefore, that although Fig. 11 shows the stability characteristics of  $\mathbf{H}_{BD}(z)$  for the given gains, that of  $\mathbf{H}_{TU}(z)$  would give identical representations; therefore, no dedicated figure is provided for the latter for brevity.

To summarize, the BD and TU methods are the preferred discretization techniques for discrete-time implementations of the continuous wind speed estimate solver in that the stability condition from the continuous-time system is preserved. Given present-day computational resources and readily available discretization methods in popular software packages, the selection for each of the methods is inconsequential from an implementation perspective. Therefore, later on in Section 5.3, a time-series numerical comparison is performed to determine the most suitable approach, also including the iterative single-step solver explained in the next section.

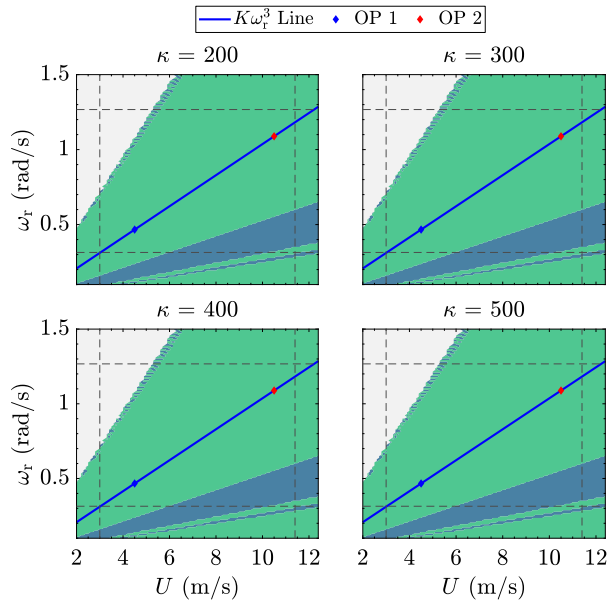

**Figure 11.** Stability region of  $\mathbf{H}_{\text{BD}}(z)$  with increasing  $\kappa = \{200, 300, 400, 500\}$  using  $h = 1/50$  s of sampling time and the Backward Difference (BD) discretization method. Identical graphical evaluation is obtained for the Tustin-discretized system  $\mathbf{H}_{\text{TU}}(z)$  for the selected gains.

## 520 5.2 Iterative Single-Step Solver

Besides the continuous wind speed estimate solver in the previous section, iterative numerical methods can also be employed to solve for the wind speed estimate. A well-known iterative method for this purpose is that of the Newton-Raphson, such as used in the work of Van Engelen and Van der Hooft (2003) and Boukhezzer and Siguerdjane (2011). This iterative algorithm finds the roots of a function given an initial guess and makes use of the ~~function's gradient~~ gradient of the function. The reliance on such a gradient, however, adds an additional layer of complexity in this case in that an extra look-up table other than that for the  $C_p$  table is needed. Moreover, the use of this extra look-up table would increase the computational burden per iteration within the algorithm. Luckily, the definition of the wind speed estimate, being an integration of the estimation error  $e_p$  over time multiplied by a gain  $K_U$  can be straightforwardly adopted in an iterative manner in such a way that  $\hat{U}$  can be obtained in a single time step. Algorithm 1 describes the proposed iterative single-step wind speed estimate solving method.

530 First, the iterative single-step algorithm computes the TSR estimate based on  $\hat{\omega}_r(k)$ , available through the aerodynamic power estimator in Section 4, and wind speed estimate  $U_i$  at the  $i$ -th iteration, namely  $\lambda_i$ . Having  $\lambda_i$ , the  $U_i$ -dependent aerodynamic power estimate can then be computed, which is used to obtain the aerodynamic power error along with  $\hat{P}_r(k)$ , available from the aerodynamic power estimator. Normalized by  $P_{g,\text{rated}}$ , this error (denoted  $e_{p,\text{norm},i}$ ), is then used to update the  $i+1$ -th wind speed estimate  $U_{i+1}$ . These steps are then repeated until the relative wind speed estimate error or the absolute, normalized,

---

**Algorithm 1** Iterative single-step method for solving wind speed estimate

---

**Require:**  $\hat{P}_r(k), \hat{\omega}_r(k), \hat{U}(k-1), i_{\max}, \epsilon_U, \epsilon_p$

**Ensure:**  $U \approx \hat{U}(k)$

```
1:  $i \leftarrow 1$ 
2:  $U_i \leftarrow \hat{U}(k-1)$ 
3: repeat
4:    $\lambda_i \leftarrow \frac{\hat{\omega}_r(k)R}{U_i}$ 
5:    $e_{p,\text{norm},i} \leftarrow \frac{\hat{P}_r(k) - \frac{1}{2}\rho AC_p(\lambda_i)U_i^3}{P_{g,\text{rated}}}$ 
6:    $U_{i+1} \leftarrow U_i + e_{p,\text{norm},i}$ 
7:    $U_{\text{old}} \leftarrow U_i$ 
8:    $i \leftarrow i + 1$ 
9: until ( $i \geq i_{\max}$ ) or ( $\left| \frac{(U_i - U_{\text{old}})}{U_i} \right| \leq \epsilon_U$ ) or ( $|e_{p,\text{norm},i}| \leq \epsilon_p$ )
10:  $\hat{U}(k) \leftarrow U_i$ 
11: return  $\hat{U}(k)$ 
```

---

535 aerodynamic power error falls within the tolerance bound  $\epsilon_U \in \mathbb{R}^+$  or  $\epsilon_p \in \mathbb{R}^+$ , respectively. Otherwise, the algorithm stops until the maximum allowed iteration  $i_{\max} \in \mathbb{Z}^+$  is reached. Finally, the algorithm outputs the wind speed estimate  $\hat{U}(k) = U_i$  from the last iteration. Note that, compared to the continuous wind speed estimate solver, the iterative method here employs  $\kappa = 1$ . Later, it will be shown that setting such a unity gain is sufficient to achieve fast convergence.

### 5.3 Wind Speed Estimate Solvers Comparisons

540 With the continuous and iterative single-step solvers explained in the previous sections, this section now compares both methods numerically. The optimal wind speed estimate solver is then picked and combined with the state estimation-based aerodynamic power estimator, as discussed in Section 4.2. To this end, the same simulation setup in Section 4.3 is considered.

First, the performance of the different continuous wind speed estimate solvers, discretized under the FE, BD, and TU methods, are compared. The estimator gain is chosen to be  $\kappa = 400$ , which is a stable gain, especially for the FE discretization at the considered operating condition ( $U_h = 7.5$  m/s, under  $I_T = 4\%$ ). Figure 12 shows the simulation results, which is focused on  $t = 210 - 230$  s timestamp for clarity. As shown in the figure, the BD- and TU-discretized wind speed estimate solvers show identical estimation performance, which is not the case in their FE-discretized counterpart. The unstable-like oscillations occurring in the beginning, middle, and end of the sequence of interest of the FE method are likely resulting from nonlinearity effects in combination with frequency folding or aliasing (Åström and Wittenmark, 2011).

550 Figure 13 depicts the time-series comparison between the BD-discretized continuous solver and the iterative method. With the same tuning parameters as the previous simulation for the former, the latter is configured with  $i_{\max} = 5$  and  $\epsilon_U = \epsilon_p = 0.01$ , which are as a good trade-off between accuracy and speed of the estimation. As evidently shown, both solvers demonstrate

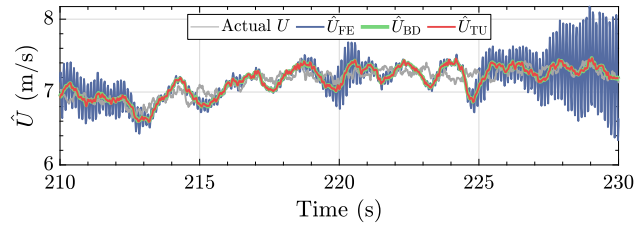

**Figure 12.** Actual wind speed  $U$  and wind speed estimates of the continuous wind speed estimate solver under different discretization methods  $\hat{U}_{(\bullet)}$ . The FE-discretized solver occasionally shows high-frequency oscillatory behavior, potentially due to combined nonlinearity and aliasing effects, which is not the case for that of the BD and TU methods for the chosen estimator gain  $\kappa = 400$ .

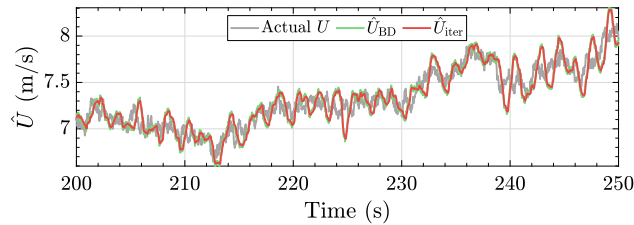

**Figure 13.** Actual wind speed  $U$  and wind speed estimates of the continuous and iterative single-step wind speed estimate solvers, the former of which is discretized with the BD method. Identical responses indicate that the accuracy of the wind speed estimate solvers depends, to a large extent, on the aerodynamic power (and rotor speed) estimation quality.

similar performance and accuracy for the presented case. However, in different scenarios, such as more noisy aerodynamic power and rotor speed estimates, both solvers may show disparities.

555 Noisy inputs would require the ~~continuous solver's integrator gain~~ integrator gain of the continuous solver to be lowered, such that high-frequency components in the input signals are attenuated but potentially resulting in lagged estimates. For the iterative solver, noisy inputs would increase the computational cost in terms of the higher number of iterations to converge to a solution.

560 Fortunately, as the role of the aerodynamic power estimation (with a bonus of rotor speed filtering) and wind speed estimate solving are decoupled in this study, the task to ensure low-noise and accurate wind speed estimate relies mostly upon the ~~former's subcomponent~~ tuning of the former subcomponent. This way, few iterations and strict error tolerances of the iterative algorithm can be maintained. Such a condition also benefits the ~~continuous solver's~~ wind speed estimate of the continuous solver; however, as it requires a high gain to maintain good estimation quality, it is still prone to having the above-mentioned sampled-time system artifacts.

565 Hence, for the final and optimal design of the power balance wind speed estimation in this work, the combination of the state estimation-based aerodynamic power estimator and iterative single-step wind speed solver is chosen and is evaluated next in ~~higher-fidelity simulations.~~ mid-fidelity simulations.

## 6 Higher-Fidelity Mid-Fidelity Simulation Setup and Results

570 With the power balance wind speed estimation design finalized, this section covers the higher-fidelity-mid-fidelity validation of the proposed algorithm. The details of the simulation setup are covered in Section 6.1, and the validation results are discussed in Section 6.2.

### 6.1 Simulation Setup

575 The simulation setup for the higher-fidelity-mid-fidelity wind speed estimator validation in this work uses the open-source simulation code OpenFAST v3.5.3 (Jonkman et al., 2024), the development of which is led by the National Renewable Energy Laboratory (NREL). OpenFAST couples several nonlinear aero-hydro-servo-elastic computational modules by which realistic and complex wind turbine dynamic responses can be simulated with high accuracy. For the validation purposes of this work, the AeroDyn, ServoDyn, ElastoDyn, and InflowWind modules of OpenFAST are used. Concerning the degrees of freedom (DOFs) of the simulated wind turbines, the following are activated:

- generator;
- 580 – drivetrain rotational-flexibility;
- first and second flapwise blade modes;
- first edgewise blade mode;
- first and second fore-aft tower modes; and
- first and second side-side tower modes;

585 Note that the drivetrain rotational-flexibility DOF is turned off when a direct-drive wind turbine is simulated.

Two wind turbines representing the respective low- and high-power ratings are simulated, namely the NREL-5MW and the IEA-22MW turbines, as introduced in Section 2.2. In contrast to using equal  $C_p$  tables in the previous analysis sections, using the reference wind turbine models in OpenFAST leads to simulating the aerodynamic properties of the respective turbines. For both turbines,  $\eta_g = 1$  is chosen.

590 With regard to the wind profile, Kaimal turbulent wind cases are considered for both turbines, with  $U_h = 7.5$  m/s and  $I_T = \{4, 12\}\%$ , generated using TurbSim (Jonkman, 2014), and used as input for the aforementioned InflowWind module. The simulations are run for 1060 s, in which the first 60 s is excluded to remove computational transients from the evaluation.

The power balance wind speed estimator employs the state-estimation-based method for the aerodynamic power estimation (Section 4) with its gain  $L$  computed using  $\omega_0 = 5.75$  rad/s and  $\zeta_0 = 4.5$ . Note that, compared to the initial low-fidelity 595 simulations in Section 4.2.2, the lower frequencies and higher dampings of the estimator are chosen and considered to be a good compromise between noise filtering and good performance in the higher-fidelity-mid-fidelity settings. Better performance might be attained by the incorporation of more systematic tuning methods that are able to find the optimal gain via cost



minimization (e.g., mean and variance of the wind speed estimate error), such as Bayesian optimization (Mulders et al., 2020) or genetic algorithms (Lara et al., 2024). With regard to the measurement noise, that of the rotor speed  $v_{\omega_r}$  is assumed to have variance of  $\sigma_{v_{\omega_r}}^2 = 10^{-5} \text{ rad}^2/\text{s}^2$ , i.e. one order of magnitude higher than that used in the low-fidelity simulations in Section 4.3.

Constant and tailored gain settings are considered, the first one being computed using the ~~NREL-5MW's~~ LSS-equivalent inertia [of the NREL-5MW](#) for both turbines, similar to what was done in Section 4.2.2, whereas the second one is tailored on the actual LSS-equivalent inertia of the simulated turbines (see Table 1). For the two turbines considered in this section, the chosen  $\omega_0$  and  $\zeta_0$  result in stable aerodynamic power estimators for both constant and tailored gain cases.

For the iterative single-step wind speed estimate solver,  $i_{\max} = 10$  and  $\epsilon_U = \epsilon_p = 0.005$  are considered. Despite the tighter convergence bounds compared to the low-fidelity simulations in Section 5.2, the wind speed estimate in the simulations of this section only requires one iteration ~~in on~~ average to solve.

The proposed method is also compared with an existing wind speed estimator, namely the Immersion and Invariance (I&I) REWS estimator, based on the work of Liu et al. (2022), the brief derivation of which is provided in Appendix A. This estimator is based on torque balance drivetrain dynamics, in which the internal model estimates the rotor speed and aims to minimize its difference from the actual measurements. Resultingly, the error compensation by a proportional-integral (PI) structure gives the wind speed estimate of this scheme. For both turbines in the low turbulence scenario, the I&I estimator gains are  $K_p = 15 \text{ m}$  and  $K_i = 3.5 \text{ m/s}$ , whereas for the high turbulence case, the gains are retuned to be  $K_p = 25 \text{ m}$  and  $K_i = 5 \text{ m/s}$  to match the performance of the proposed method. Note that there have not been any studies yet in systematic tuning across a range of turbine sizes for the I&I approach, to the best of the authors' knowledge. Thus, the above PI gains are tuned heuristically and equally for NREL-5MW and IEA-22MW. The next section covers the results from the OpenFAST simulations for the aforementioned settings.

## 6.2 Results

The time series [performance](#) evaluation of the power balance wind speed estimator ~~'s performance~~ is provided in this section for the considered reference turbines, NREL-5MW and IEA-22MW, where for each turbine. Later on, the statistical assessments of the numerical simulation results are provided at the end of this section.

Figure 14 depicts the time series results of the wind speed estimation for the NREL-5MW. For both the turbulent cases, it is shown that both methods are able to capture the slow-varying component of the actual wind speed well, with the proposed method showing less noisy results compared to I&I. This is mainly because the latter method, by default, does not contain any noise filtering feature, which can be added by low-pass filtering, for instance. Additional filtering would lead to additional phase lags and, thus, a slower wind speed estimation. The proposed estimator, thus, demonstrates superior noise handling capabilities over I&I, which obviates the need for additional filtering. However, as such a modification is not the main focus of this work, the original I&I structure is retained.

An interesting behavior worth paying attention to from both wind speed estimation methods is the somewhat equal biases with respect to the actual wind speed. This is evident at the beginning of the low turbulent wind case and at 525 s and 625 s of

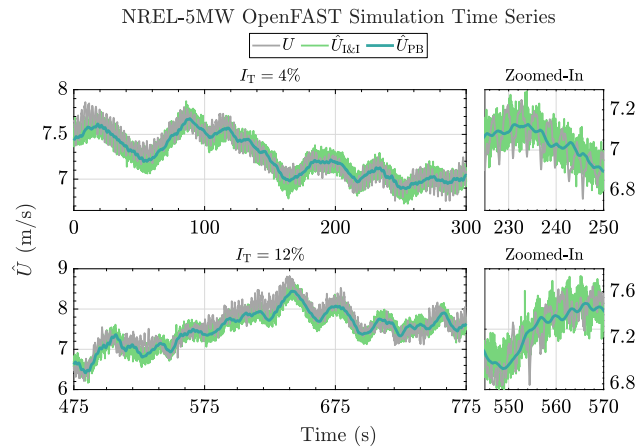

**Figure 14.** Wind speed estimation time series for the NREL-5MW wind turbine. The proposed method (blue line) gives a smooth, less noisy estimate compared to the I&I (green line) for both low (top plots) and high (bottom plots) turbulent cases. The low-frequency component of the wind speed is captured where biased estimation occasionally occurs, potentially due to an inaccurate  $C_p$  table utilized in both estimators and an absence of dynamic inflow modeling in the estimators. The actual REWS, as outputted by OpenFAST, is shown in the gray line. Zoomed-in plots of 25-s time spans are provided on the right for clearer observation of the estimation performance.

the high turbulent case. Such biases are potentially coming from the inaccuracy in the  $C_p$  table (Brandetti et al., 2022), which was generated by steady-state simulations, which might not necessarily be accurate during transients. Additionally, the absence of dynamic inflow effects in the estimator model could play a role in the appearance of such estimation biases (Knudsen and Bak, 2013).

Having the estimation results for the NREL-5MW presented, that of the IEA-22MW is showcased. The main goal of the simulations with a larger turbine is to validate the performance differences when constant and tailored estimator gains are used, the proof-of-concept of which was shown in the low-fidelity simulations of Section 4.2.2. Figure 15 depicts the time series results of the wind speed estimation for the IEA-22MW wind turbine. For the constant gain case, the  $L_2$  aerodynamic power estimator gain is based on the one tuned for the NREL-5MW turbine, whereas that of the tailored gain case is determined based on the inertia of the IEA-22MW turbine using (22b). Evident in the figure is the better performance of the proposed method under tailored  $L_2$  compared to the constant  $L_2$ —note the displayed lagged behavior of the latter. With respect to the I&I results, the former performs similarly in terms of estimation quality of the low-frequency component in the wind speed with the advantage of less noisy estimates. Similar to the NREL-5MW results previously, estimation biases are also observed in the IEA-22MW case, which, again, are likely attributed to the inaccuracies in the  $C_p$  table of the corresponding turbine and absence of dynamic inflow modeling.

From the aforementioned simulations, aerodynamic power and wind speed estimation error histograms are provided for the considered turbines. Figure 16 depicts the former, where the top row shows the histograms of the NREL-5MW turbine, and the bottom row the histograms of the IEA-22MW. For all turbulent cases and estimators, the normalized aerodynamic power

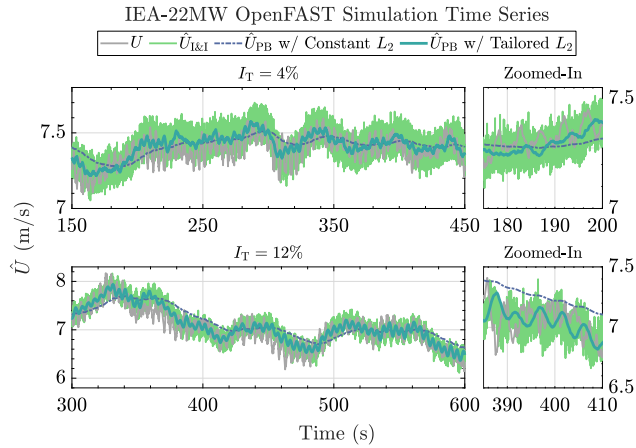

**Figure 15.** Wind speed estimation time series for the IEA-22MW wind turbine. The proposed method gives a smooth, less noisy estimate compared to the I&I (green line) for both low (top plots) and high (bottom plots) turbulent cases. Constant  $L_2$  (dashed dark blue line) results in lagged estimation compared to gain-tailored  $L_2$  (solid blue line). The actual REWS, as outputted by OpenFAST, is shown in the gray line. Zoomed-in plots of 25-s time spans are provided on the right for clearer observation of the estimation performance.

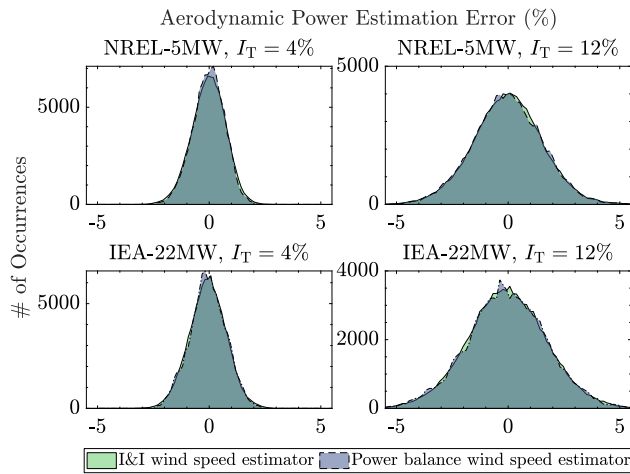

**Figure 16.** Histograms Aerodynamic power estimation error histograms of the wind speed estimators' aerodynamic power estimation errors. Both the I&I and the proposed power balance wind speed estimator are shown to have similar aerodynamic power error distributions.

650 estimation errors, defined as  $(P_r - \hat{P}_r)/P_{g,rated} \cdot 100\%$ , are shown to be similar. Most errors of the I&I and the proposed methods (only shown for the tailored gain case) are concentrated at 0% with decreasing occurrences at larger percentages, resembling a bell curve. At higher turbulence intensity, wider histograms are obtained, which is logical due to the limitation of both estimators in capturing high-frequency contents of the actual REWS.

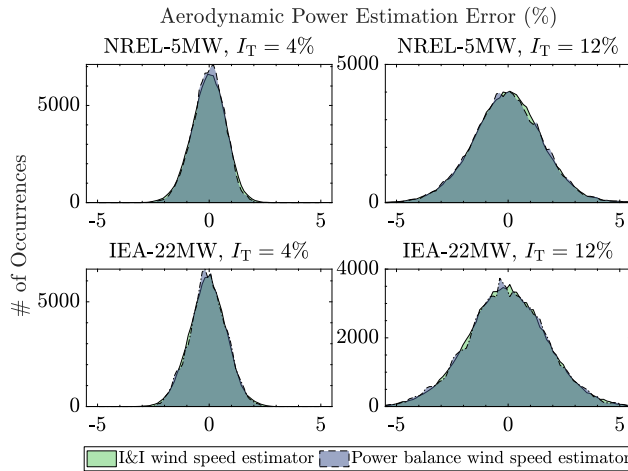

**Figure 17.** Histograms-Wind speed estimation error histograms of the wind speed estimators’-wind speed estimation errors. Both the I&I and the proposed power balance wind speed estimator are shown to have similar wind speed estimation error distributions. Subtle differences are also shown for both the I&I and the proposed power balance wind speed estimator, where the former has slightly higher occurrences at the histograms’ tails due to the higher noise level, while the latter has slightly higher occurrences at the center of the distributions.

Figure 17 shows the histograms of the normalized wind speed estimation errors, defined as  $(U - \hat{U})/U_h \cdot 100\%$ . The current  
655 figure sheds new light on the presence of skewed histograms. For the NREL-5MW turbine, the error histograms are right-skewed, indicating the wind speed tends to be underestimated. On the contrary, the IEA-22MW tends to be left-skewed; that is, the estimators tend to overestimate the wind speed value instead. Given that such skewness is not observed for the aerodynamic power estimation errors, that of the wind speed estimation might come from the inaccuracy of the  $C_p$  tables for the corresponding turbines, as previously suspected. Online calibration of such a  $C_p$  table has been studied, e.g. in Mulders  
660 et al. (2023a, b), which can be used to correct the wind speed estimation quality to minimize such skewness.

Based on the higher-fidelity-mid-fidelity simulation results reported above, the following conclusions of this section are drawn. First, it has been shown that the mean values of both the power-based wind speed estimator and the I&I are identical. Moreover, it has also been demonstrated that the use of steady-state information, i.e. by  $C_p$  tables, in a dynamic environment can lead to skewness for both estimators. Dynamic inflow modeling might also be required for future improvements to the  
665 current scheme. Nonetheless, under noisy measurement conditions, the former exhibits more noise resilience, whereas the latter requires additional filtering—complicating the design and potentially introducing phase lag. Finally, the convenience provided by the gain-tailoring for the proposed method has allowed for performance calibration between the small and larger wind turbines.

## 7 Conclusions

670 In this work, an analysis framework and optimal design for a power balance REWS estimator have been proposed. The estimator is subdivided into two subcomponents based on their role in the scheme, namely, the aerodynamic power estimator and the wind speed estimate solver. Two aerodynamic power estimator techniques have been thoroughly analyzed, one based on numerical derivative and another based on the Luenberger state estimation technique. Of the two potential aerodynamic power estimators, the state estimation-based technique has been chosen due to its better resilience against noisy measurements.

675 Moreover, for the first time, a gain-tailoring method for performance calibration throughout a range of modern wind turbine sizes has been formalized. Regarding the wind speed estimate solvers, two options have also been considered, namely the continuous and iterative single-step solvers. In this study, the ~~former's~~ frequency-domain stability analysis [of the former](#) has been conducted in the continuous-time domain. Under the Forward Euler discretization, deteriorations in the stability properties of this solver have been identified and shown in the discrete-time domain. Despite the favorable stability properties for

680 the analyzed Backward Difference and Tustin discretization method, the more robust iterative single-step wind speed estimate solver has been chosen and, in combination with the state estimation-based aerodynamic power estimator, forms the optimal power balance wind speed estimator structure. This optimal power balance wind speed estimator has been validated in the mid-fidelity simulation environment OpenFAST, utilizing the NREL-5MW and IEA-22MW wind turbines, representing small and large wind turbines in the considered range, respectively. The proposed method and the considered 'baseline' I&I wind

685 speed estimator have shown similar performance in estimating the low-frequent component of the wind speed, with the latter performing good REWS tracking, better noise resilience, and convenient estimator gain calibration across different turbine sizes.

Zero-bias aerodynamic power estimations have been obtained for both estimators; however, time series and histogram analyses have shown the appearance of biased wind speed estimations for both methods. Such biased estimations might be attributed

690 to the inability of the steady-state  $C_p$  data used to estimate the wind speed in a highly dynamic environment, excluding effects such as dynamic inflow. However, learning algorithms to capture the true power coefficient during operation exist in the literature and can be incorporated to improve the ~~proposed method's performance~~ [performance of the proposed method](#).

Future study will consider providing an optimal means for the estimator tuning, e.g., by Bayesian optimization ~~and~~, incorporating currently unmodeled dynamics, e.g., drivetrain torsion, tower dynamics, and dynamic inflow effects, [and accounting](#)

695 [for blade pitch information](#).

### Appendix A: Improved Immersion and Invariance Wind Speed Estimator

The improved Immersion and Invariance (I&I) wind speed estimator as studied in Liu et al. (2022) is provided in brief in this section. Readers interested in the detailed derivations and analyses are referred to Liu et al. (2022).

The I&I estimator is described by the following torque balance equation

$$700 \quad \dot{\hat{\omega}}_r(t) = \Phi(\omega_r(t), \hat{U}(t)) - \frac{T_g(t)}{J}, \quad (\text{A1})$$

with the following nonlinearity

$$\Phi\left(\omega_r(t), \hat{U}(t)\right) := \frac{\rho A \hat{U}(t)^3 C_p\left(\hat{\lambda}(t)\right)}{2J\omega_r(t)}. \quad (\text{A2})$$

The wind speed estimate is the result of the minimization of the error between rotor speed and its estimate by a proportional-integral compensator, that is

$$705 \quad \hat{U}(t) = K_p e_{\omega_r - \hat{\omega}_r}(t) + K_i \int_0^t e_{\omega_r - \hat{\omega}_r}(\tau) d\tau, \quad (\text{A3})$$

with  $K_p$  as the proportional gain and  $K_i$  the integrator gain, where

$$e_{\omega_r - \hat{\omega}_r}(t) = \omega_r(t) - \hat{\omega}_r(t). \quad (\text{A4})$$

*Author contributions.* AKP: conceptualization, methodology, software, validation, investigation, visualization, writing (original draft). FS: conceptualization, supervision, investigation, writing (review and editing) SPM: conceptualization, methodology, supervision, investigation,  
710 writing (review and editing).

*Competing interests.* The authors declare that they have no conflict of interest.

*Acknowledgements.* This project has been performed in cooperation with Vestas Wind Systems A/S.

## References

- Abbas, N. J., Zalkind, D. S., Pao, L., and Wright, A.: A Reference Open-Source Controller for Fixed and Floating Offshore Wind Turbines, *Wind Energy Science*, 7, 53–73, <https://doi.org/10.5194/wes-7-53-2022>, 2022.
- 715 Åström, K. and Wittenmark, B.: *Computer-Controlled Systems: Theory and Design*, Third Edition, Dover Books on Electrical Engineering, Dover Publications, ISBN 9780486486130, <https://books.google.nl/books?id=9Y6D5vviqMgC>, 2011.
- Bortolotti, P., Tarres, H. C., Dykes, K., Merz, K., Sethuraman, L., Verelst, D., and Zahle, F.: IEA Wind Task 37 on Systems Engineering in Wind Energy – WP2.1 Reference Wind Turbines, Tech. rep., International Energy Agency, <https://www.nrel.gov/docs/fy19osti/73492.pdf>, 2019.
- 720 Bossanyi, E. A.: The Design of Closed Loop Controllers for Wind Turbines, *Wind Energy*, 3, 149–163, <https://doi.org/10.1002/we.34>, 2000.
- Boukhezzar, B. and Siguerdidjane, H.: Nonlinear Control of a Variable-Speed Wind Turbine Using a Two-Mass Model, *IEEE Transactions on Energy Conversion*, 26, 149–162, <https://doi.org/10.1109/TEC.2010.2090155>, 2011.
- Brandetti, L., Liu, Y., Mulders, S. P., Ferreira, C., Watson, S., and van Wingerden, J. W.: On the Ill-Conditioning of the Combined Wind Speed Estimator and Tip-Speed Ratio Tracking Control Scheme, *Journal of Physics: Conference Series*, 2265, 032085, <https://doi.org/10.1088/1742-6596/2265/3/032085>, 2022.
- 725 Brandetti, L., Mulders, S. P., Liu, Y., Watson, S., and van Wingerden, J. W.: Analysis and Multi-Objective Optimisation of Wind Turbine Torque Control Strategies, *Wind Energy Science*, 8, 1553–1573, <https://doi.org/10.5194/wes-8-1553-2023>, 2023.
- Burton, T., Jenkins, N., Sharpe, D., and Bossanyi, E.: *Wind Energy Handbook*, John Wiley & Sons, Ltd, Chichester, UK, ISBN 978-1-119-99271-4, <https://doi.org/10.1002/9781119992714>, 2011.
- 730 Gaertner, E., Rinker, J., Sethuraman, L., Zahle, F., Anderson, B., Barter, G., Abbas, N., Meng, F., Bortolotti, P., Skrzypinski, W., Scott, G., Feil, R., Bredmose, H., Dykes, K., Shields, M., Allen, C., and Viselli, A.: Definition of the IEA Wind 15-Megawatt Offshore Reference Wind Turbine Technical Report, Tech. rep., 2020.
- Global Wind Energy Council: *Global Wind Report 2024*, Report, Global Wind Energy Council, Belgium, 2024.
- 735 Hovgaard, T. G., Boyd, S., and Jørgensen, J. B.: Model Predictive Control for Wind Power Gradients, *Wind Energy*, 18, 991–1006, <https://doi.org/10.1002/we.1742>, 2015.
- IEEE: IEEE Recommended Practice for Excitation System Models for Power System Stability Studies, IEEE Std 421.5-2016 (Revision of IEEE Std 421.5-2005), pp. 1–207, <https://doi.org/10.1109/IEEESTD.2016.7553421>, 2016.
- 740 Jonkman, B., Platt, A., Mudafort, R. M., Branlard, E., Sprague, M., Ross, H., jjonkman, HaymanConsulting, Slaughter, D., Hall, M., Vijayakumar, G., Buhl, M., Russell9798, Bortolotti, P., reos rcrozier, Ananthan, S., RyanDavies19, S., M., Rood, J., rdamiani, nrmendoza, sinolonghai, pschuenemann, ashesh2512, kshaler, Housner, S., psakievich, Wang, L., Bendl, K., and Carmo, L.: *OpenFAST/openfast: v3.5.3*, <https://doi.org/10.5281/zenodo.10962897>, 2024.
- Jonkman, B. J.: *TurbSim User’s Guide v2.00.00*, Renewable Energy, 2014.
- Jonkman, J., Butterfield, S., Musial, W., and Scott, G.: Definition of a 5-MW Reference Wind Turbine for Offshore System Development, Tech. rep., National Renewable Energy Laboratory (NREL), Golden, CO, <https://doi.org/10.2172/947422>, 2009.
- 745 Knudsen, T. and Bak, T.: Simple Model for Describing and Estimating Wind Turbine Dynamic Inflow, in: 2013 American Control Conference, pp. 640–646, ISSN 2378-5861, <https://doi.org/10.1109/ACC.2013.6579909>, 2013.
- Koerber, A. and King, R.: Combined Feedback–Feedforward Control of Wind Turbines Using State-Constrained Model Predictive Control, *IEEE Transactions on Control Systems Technology*, 21, 1117–1128, <https://doi.org/10.1109/TCST.2013.2260749>, 2013.

- 750 Kumar, A. and Stol, K.: Scheduled Model Predictive Control of a Wind Turbine, in: 47th AIAA Aerospace Sciences Meeting Including The New Horizons Forum and Aerospace Exposition, vol. 5, pp. 3860–3870, American Institute of Aeronautics and Astronautics, Reston, Virginia, ISBN 978-1-60086-973-0, <https://doi.org/10.2514/6.2009-481>, 2009.
- Lara, M., Vázquez, F., van Wingerden, J. W., Mulders, S. P., and Garrido, J.: Multi-Objective Optimization of Individual Pitch Control for Blade Fatigue Load Reductions for a 15 MW Wind Turbine, in: 2024 European Control Conference (ECC), pp. 669–674, <https://doi.org/10.23919/ECC64448.2024.10590830>, 2024.
- 755 Lazzerini, G., Deleuran Grunnet, J., Gybel Hovgaard, T., Caponetti, F., Datta Madireddi, V., De Tavernier, D., and Mulders, S. P.: COFLEX: A novel set point optimiser and feedforward-feedback control scheme for large flexible wind turbines, *Wind Energy Science Discussions*, 2024, 1–35, <https://doi.org/10.5194/wes-2024-151>, 2024.
- Liu, Y., Pamososuryo, A. K., Ferrari, R. M., and van Wingerden, J. W.: The Immersion and Invariance Wind Speed Estimator Revisited and New Results, *IEEE Control Systems Letters*, 6, 361–366, <https://doi.org/10.1109/LCSYS.2021.3076040>, 2022.
- 760 Moustakis, N., Mulders, S. P., Kober, J., and Wingerden, J. W. V.: A Practical Bayesian Optimization Approach for the Optimal Estimation of the Rotor Effective Wind Speed, *Proceedings of the American Control Conference*, 2019-July, 4179–4185, 2019.
- Mulders, S., Brandetti, L., Spagnolo, F., Liu, Y., Christensen, P., and van Wingerden, J.: A Learning Algorithm for the Calibration of Internal Model Uncertainties in Advanced Wind Turbine Controllers: A Wind Speed Measurement-Free Approach, in: 2023 American Control Conference (ACC), pp. 1486–1492, IEEE, San Diego, CA, USA, ISBN 9798350328066, <https://doi.org/10.23919/ACC55779.2023.10156125>, 2023a.
- 765 Mulders, S. P., Pamososuryo, A. K., and van Wingerden, J. W.: Efficient Tuning of Individual Pitch Control: A Bayesian Optimization Machine Learning Approach, in: *Journal of Physics: Conference Series*, vol. 1618, <https://doi.org/10.1088/1742-6596/1618/2/022039>, 2020.
- 770 Mulders, S. P., Liu, Y., Spagnolo, F., Christensen, P. B., and van Wingerden, J. W.: An Iterative Data-Driven Learning Algorithm for Calibration of the Internal Model in Advanced Wind Turbine Controllers, *IFAC-PapersOnLine*, 56, 8406–8413, <https://doi.org/10.1016/j.ifacol.2023.10.1035>, 2023b.
- Odgaard, P. F., Hovgaard, T. G., and Wiesniewski, R.: Model Predictive Control for Wind Turbine Power Boosting, 2016 European Control Conference, ECC 2016, pp. 1457–1462, <https://doi.org/10.1109/ECC.2016.7810495>, 2017.
- 775 Ortega, R., Mancilla-David, F., and Jaramillo, F.: A Globally Convergent Wind Speed Estimator for Wind Turbine Systems, *International Journal of Adaptive Control and Signal Processing*, 27, 413–425, <https://doi.org/10.1002/acs.2319>, 2013.
- Østergaard, K. Z., Brath, P., and Stoustrup, J.: Estimation of Effective Wind Speed, *Journal of Physics: Conference Series*, 75, 0–9, <https://doi.org/10.1088/1742-6596/75/1/012082>, 2007.
- Pamososuryo, A. K., Liu, Y., Gybel Hovgaard, T., Ferrari, R., and van Wingerden, J. W.: Convex Economic Model Predictive Control for Blade Loads Mitigation on Wind Turbines, *Wind Energy*, n/a, <https://doi.org/10.1002/we.2869>, 2023.
- 780 Rodriguez, A. G. G., Rodriguez, A. G. G., and Payán, M. B.: Estimating wind turbines mechanical constants, *Renewable energy & power quality journal*, 1, 697–704, <https://api.semanticscholar.org/CorpusID:125833352>, 2007.
- Soltani, M. N., Knudsen, T., Svenstrup, M., Wisniewski, R., Brath, P., Ortega, R., and Johnson, K. E.: Estimation of Rotor Effective Wind Speed: A Comparison, *IEEE Transactions on Control Systems Technology*, 21, 1155–1167, <https://doi.org/10.1109/TCST.2013.2260751>, 2013.
- 785 Van Engelen, T. G. and Van der Hooft, E. L.: Feed Forward Control of Estimated Wind Speed, 2003.



- 790 Veers, P., Dykes, K., Lantz, E., Barth, S., Bottasso, C. L., Carlson, O., Clifton, A., Green, J., Green, P., Holttinen, H., Laird, D., Lehtomäki, V., Lundquist, J. K., Manwell, J., Marquis, M., Meneveau, C., Moriarty, P., Munduate, X., Muskulus, M., Naughton, J., Pao, L., Paquette, J., Peinke, J., Robertson, A., Sanz Rodrigo, J., Sempreviva, A. M., Smith, J. C., Tuohy, A., and Wiser, R.: Grand Challenges in the Science of Wind Energy, *Science*, 366, eaau2027, <https://doi.org/10.1126/science.aau2027>, 2019.
- Verhaegen, M. and Verdult, V.: *Filtering and System Identification*, vol. 9780521875, Cambridge University Press, Cambridge, ISBN 978-0-511-61888-8, <https://doi.org/10.1017/CBO9780511618888>, 2007.
- 795 Zahle, F., Barlas, A., Loenbaek, K., Bortolotti, P., Zalkind, D., Wang, L., Labuschagne, C., Sethuraman, L., and Barter, G.: Definition of the IEA Wind 22-Megawatt Offshore Reference Wind Turbine, Tech. rep., Technical University of Denmark, <https://doi.org/10.11581/DTU.00000317>, 2024.
